# Supplementary material for: TALENs facilitate targeted genome editing in human cells with high specificity and low cytotoxicity
Source: PubMed Central journal article supplement (PMC4041469; doi:10.1093/nar/gku305), 2014-05-03
Supplement: supp_gku305_nar-03711-h-2013-File007.pdf [file supp_gku305_nar-03711-h-2013-File007.pdf]

Supplementary material

**TALENs mediate genome editing with superior specificity and lower toxicity than matched ZFNs**

Mussolino C., Alzubi J., Fine E.J., Morbitzer R., Cradick T.J., Lahaye T., Bao G. and Cathomen T.

|                                |                                                                                                              |
|--------------------------------|--------------------------------------------------------------------------------------------------------------|
| <b>Supplementary Figure S1</b> | Amino acid sequences of the TALEN scaffold and ZFNs used in this study                                       |
| <b>Supplementary Figure S2</b> | TALEN and ZFN monomers expression levels                                                                     |
| <b>Supplementary Figure S3</b> | Basepair composition of the 20 TALEN target half-sites                                                       |
| <b>Supplementary Figure S4</b> | Relationship between nuclease activity and target locus expression                                           |
| <b>Supplementary Figure S5</b> | <i>CCR5</i> -specific designer nuclease associated toxicity                                                  |
| <b>Supplementary Table S1</b>  | Target sequences of the nuclease pairs used in this study                                                    |
| <b>Supplementary Table S2</b>  | Target sites in <i>CCR5</i> and <i>CCR2</i>                                                                  |
| <b>Supplementary Table S3</b>  | Off-target sites of <i>CCR5</i> - and <i>AAVS1</i> -specific zinc finger nucleases predicted by PROGNOS tool |
| <b>Supplementary Table S4</b>  | Off-target sites of <i>CCR5</i> - and <i>AAVS1</i> -specific TALENs predicted by PROGNOS tool                |
| <b>Supplementary Table S5</b>  | Results of the SMRT sequencing                                                                               |
| <b>Supplementary Table S6</b>  | Mutations induced by <i>CCR5</i> -specific designer nucleases                                                |
| <b>Supplementary Table S7</b>  | List of primers used in this study                                                                           |

## Mussolino *et al.* Supplementary Figure S1

**a**

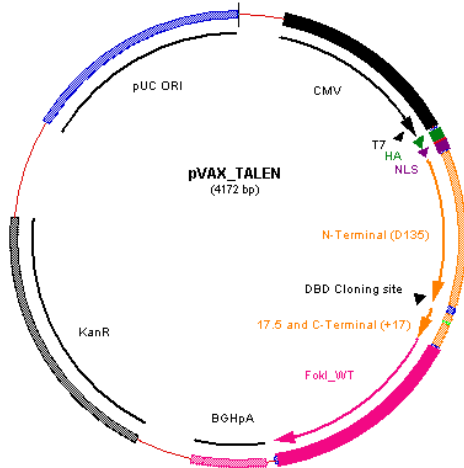

**b**

### **N-Terminal (Δ135):**

APRRRAAQPSDASPAAQVDLRTLGYSQQQQEKIKPKVRSTVAQHHEALVGHGFTHAHIVALSQHPAALGTVAVKYQDM  
IAALPEATHEAIVGVGKQWSGARALEALLTVAGELRGPPLQLDTGQLLKIARGGVTAVEAVHAWRNALTGAPLN

### **Aligned repeat domains (DBD):**

```

1   LTP (e/q) QVVAIASxxxGGKQALETVQ (r/a) LLPVLCQAHG
2   LTP (e/q) QVVAIASxxxGGKQALETVQ (r/a) LLPVLCQAHG
3   LTP (e/q) QVVAIASxxxGGKQALETVQ (r/a) LLPVLCQAHG
4   LTP (e/q) QVVAIASxxxGGKQALETVQ (r/a) LLPVLCQAHG
5   LTP (e/q) QVVAIASxxxGGKQALETVQ (r/a) LLPVLCQAHG
6   LTP (e/q) QVVAIASxxxGGKQALETVQ (r/a) LLPVLCQAHG
7   LTP (e/q) QVVAIASxxxGGKQALETVQ (r/a) LLPVLCQAHG
8   LTP (e/q) QVVAIASxxxGGKQALETVQ (r/a) LLPVLCQAHG
9   LTP (e/q) QVVAIASxxxGGKQALETVQ (r/a) LLPVLCQAHG
10  LTP (e/q) QVVAIASxxxGGKQALETVQ (r/a) LLPVLCQAHG
11  LTP (e/q) QVVAIASxxxGGKQALETVQ (r/a) LLPVLCQAHG
12  LTP (e/q) QVVAIASxxxGGKQALETVQ (r/a) LLPVLCQAHG
13  LTP (e/q) QVVAIASxxxGGKQALETVQ (r/a) LLPVLCQAHG
14  LTP (e/q) QVVAIASxxxGGKQALETVQ (r/a) LLPVLCQAHG
15  LTP (e/q) QVVAIASxxxGGKQALETVQ (r/a) LLPVLCQAHG
16  LTP (e/q) QVVAIASxxxGGKQALETVQ (r/a) LLPVLCQAHG
17  LTP (e/q) QVVAIASxxxGGKQALETVQ (r/a) LLPVLCQAHG
  
```

### **17.5<sup>th</sup> repeat (underlined) and C-Terminal (+17):**

LTPQQVVAIASxxxGGRPALESIVAQLSRPDPALAALT

### **RVDs (xx):**

HD: CACGAC  
NI: AATATC  
NG: AATGGC  
NN: AATAAT

**C**

&gt;ZFNC\_Left

MGYPYDVPDYASRPKKKRKVGIIHASPAAMAERPFQCRICMRNFS**SDRSNLSR**HIRTHTGEKPFACDICGRKFA**ISSNLN**  
**SHTK**IHTGSQKPFQCRICMRNFS**RSNDNLAR**HIRTHTGEKPFACDICGRKFAT**SGNLTR**HTKIHLRGSQ**LVKSELEEK**  
 SELRHKLKYPHEYIELIEIARNSTQDRILEMKVMEFFMKVYGYRGKHLGGSRKPDGAIYTVGSPIDYGVIVDTKAYS  
 GYNLPIGQADEMERYVEENQTRNKHANPNEWKVPSSVTEFKFLFVSGHFKGNKYKAQLTRLNHI**TNCNGAVLSVEE**  
 LLIGGEMIKAGTLTLEEVRRKF**NNGEINF**

&gt;ZFNC\_Right

MGYPYDVPDYASRPKKKRKVGIIHASPAAMAERPFQCRICMRNFS**RSNDLSV**HIRTHTGEKPFACDICGRKFA**QKINLQ**  
**VHTK**IHTGEKPFQCRICMRNFS**RSVDLSE**HIRTHTGEKPFACDICGRKFA**QRNHR**THTKIHLRGSQ**LVKSELEEK**  
 ELRHKLKYPHEYIELIEIARNSTQDRILEMKVMEFFMKVYGYRGKHLGGSRKPDGAIYTVGSPIDYGVIVDTKAYSG  
 GYNLPIGQADEMORYVKENQTRNKHINPNEWKVPSSVTEFKFLFVSGHFKGNKYKAQLTRLNHV**TNCNGAVLSVEE**  
 LLIGGEMIKAGTLTLEEVRRKF**NNGEINF**

&gt;ZFNA\_Left

MGYPYDVPDYASRPKKKRKVGIIHASPAAMAERPFQCRICMRNFS**YNWHLQR**HIRTHTGEKPFACDICGRKF**ARSDHLT**  
**THTK**IHTGSQKPFQCRICMRNFS**SHNYARDCH**IRTHTGEKPFACDICGRKFA**QONSTR**IGHTKIHLRGSQ**LVKSELEEK**  
 SELRHKLKYPHEYIELIEIARNSTQDRILEMKVMEFFMKVYGYRGKHLGGSRKPDGAIYTVGSPIDYGVIVDTKAYS  
 GYNLPIGQADEMERYVEENQTRNKHANPNEWKVPSSVTEFKFLFVSGHFKGNKYKAQLTRLNHI**TNCNGAVLSVEE**  
 LLIGGEMIKAGTLTLEEVRRKF**NNGEINF**

&gt;ZFNA\_Right

MGYPYDVPDYASRPKKKRKVGIIHGVPAAAMAERPFQCRICMRNFS**SQSSNLAR**HIRTHTGEKPFACDICGRKF**ARTDYLV**  
**DHTK**IHTGSQKPFQCRICMRNFS**SYNTHLTR**HIRTHTGEKPFACDICGRKFA**QGYNLAG**HTKIHLRGSQ**LVKSELEEK**  
 SELRHKLKYPHEYIELIEIARNSTQDRILEMKVMEFFMKVYGYRGKHLGGSRKPDGAIYTVGSPIDYGVIVDTKAYS  
 GYNLPIGQADEMORYVKENQTRNKHINPNEWKVPSSVTEFKFLFVSGHFKGNKYKAQLTRLNHV**TNCNGAVLSVEE**  
 LLIGGEMIKAGTLTLEEVRRKF**NNGEINF**

&gt;ZFNI\_Left

MGYPYDVPDYASRPKKKRKVGIIHGVPAAAMAERPFQCRICMRNFS**RSDTLSE**HIRTHTGEKPFACDICGRKFA**ARSTR**  
**THTK**IHTGSQKPFQCRICMRNFS**RSDSL**SKHIRTHTGEKPFACDICGRKFA**QRSNLKV**HTKIHLRGSQ**LVKSELEEK**  
 SELRHKLKYPHEYIELIEIARNSTQDRILEMKVMEFFMKVYGYRGKHLGGSRKPDGAIYTVGSPIDYGVIVDTKAYS  
 GYNLPIGQADEMERYVEENQTRNKHANPNEWKVPSSVTEFKFLFVSGHFKGNKYKAQLTRLNHI**TNCNGAVLSVEE**  
 LLIGGEMIKAGTLTLEEVRRKF**NNGEINF**

&gt;ZFNI\_Right

MGYPYDVPDYASRPKKKRKVGIIHGVPAAAMAERPFQCRICMRNFS**RSNDLSV**HIRTHTGEKPFACDICGRKF**ARNAHRI**  
**NHTK**IHTGSQKPFQCRICMRNFS**RSDTLSE**HIRTHTGEKPFACDICGRKFA**ARSTR**TNHTKIHLRGSQ**LVKSELEEK**  
 SELRHKLKYPHEYIELIEIARNSTQDRILEMKVMEFFMKVYGYRGKHLGGSRKPDGAIYTVGSPIDYGVIVDTKAYS  
 GYNLPIGQADEMORYVKENQTRNKHINPNEWKVPSSVTEFKFLFVSGHFKGNKYKAQLTRLNHV**TNCNGAVLSVEE**  
 LLIGGEMIKAGTLTLEEVRRKF**NNGEINF**

**Supplementary Figure S1.** Amino acid sequences of the TALEN scaffold and ZFNs used in this study. (a) “Level 3” TALEN destination vector. The functional portions of the Level 3 TALEN destination vector include the CMV promoter, SV40 nuclear localization signal (NLS), HA-tag (HA) and WT *FokI* cleavage domain (*FokI*\_WT). The DNA binding domain (DBD) is cloned in the DBD cloning site. (b) Protein sequence of TALEN scaffold. The protein sequence of our previously published optimal TALEN architecture ( $\Delta 135/+17$ ) is shown. In the central repeat domains, amino acid variability is shown in brackets (Reviewed in 6) and “xx” indicates the repeat variable di-residues (RVDs) defined below. (c) ZFNs protein sequences. The recognition  $\alpha$ -helices are highlighted in bold, the obligate heterodimeric *FokI* domains are underlined.

Mussolino *et al.* Supplementary Figure S2

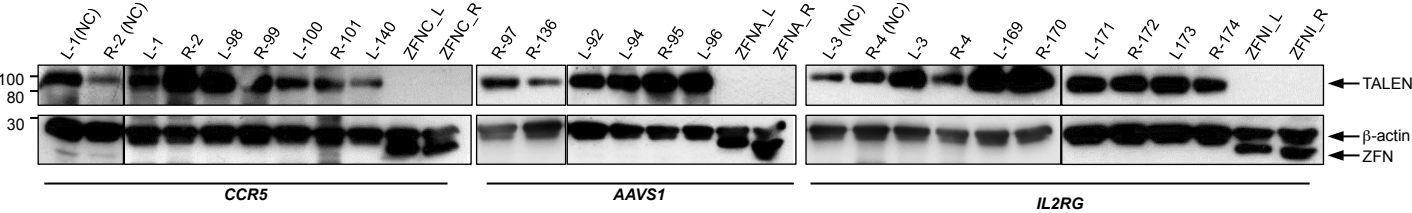

**Supplementary Figure S2.** TALEN and ZFN monomer expression levels. HEK293T cells were transfected with a single nuclease expression plasmid using PEI and harvested 48 hours later. Immunoblotting of equal amounts of cell lysates was performed with antibodies recognizing the HA-tag epitope (TALENs or ZFNs) and  $\beta$ -actin to monitor for protein load. The figure is a combination of different gel images, each separated by vertical black lines. The protein ladder is indicated on the left (kDa).

Mussolino *et al.* Supplementary Figure S3

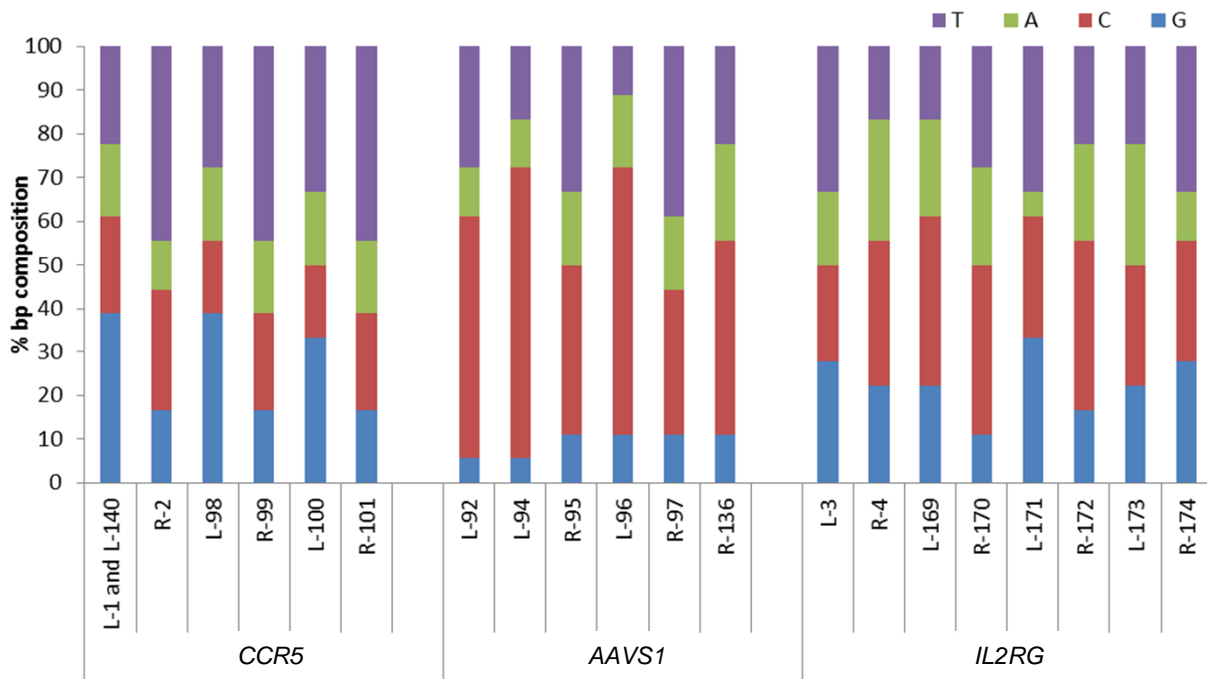

**Supplementary Figure S3.** Basepair composition of the 20 TALEN target half-sites. The graph depicts the nucleotide compositions of the 20 target sites in the three loci. Note that the *CCR5*-specific TALEN monomers L-1 and L-140 target the same site but were cloned into two different plasmid backbones (pAC and pVAX, respectively). The 5'-T in position 0 was not included.

Mussolino *et al.* Supplementary Figure S4

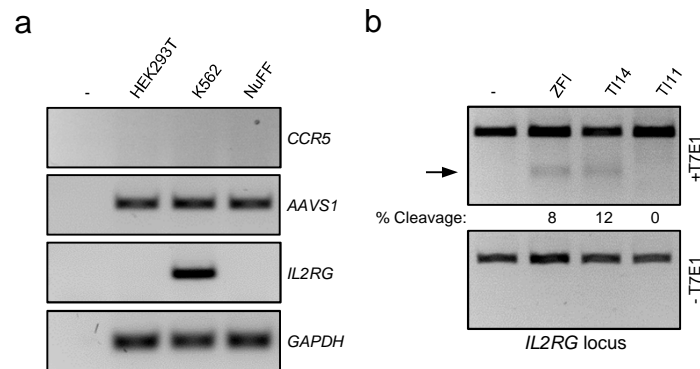

**Supplementary Figure S4.** Relationship between nuclease activity and target locus expression. **(a)** Expression profiles of the target loci in three different cell lines. Expression was determined by semi-quantitative RT-PCR. GAPDH was used as a control. **(b)** Disruption of the human *IL2RG* locus in K562 cells. Genomic DNA was extracted from cells 3 days post-nucleofection and subjected to PCR amplification of the target locus, followed by T7E1 assay (upper panel) or left untreated (lower panel). The arrow indicates the expected position of the digestion product. The average percentage of modified alleles is indicated.

Mussolino *et al.* Supplementary Figure S5

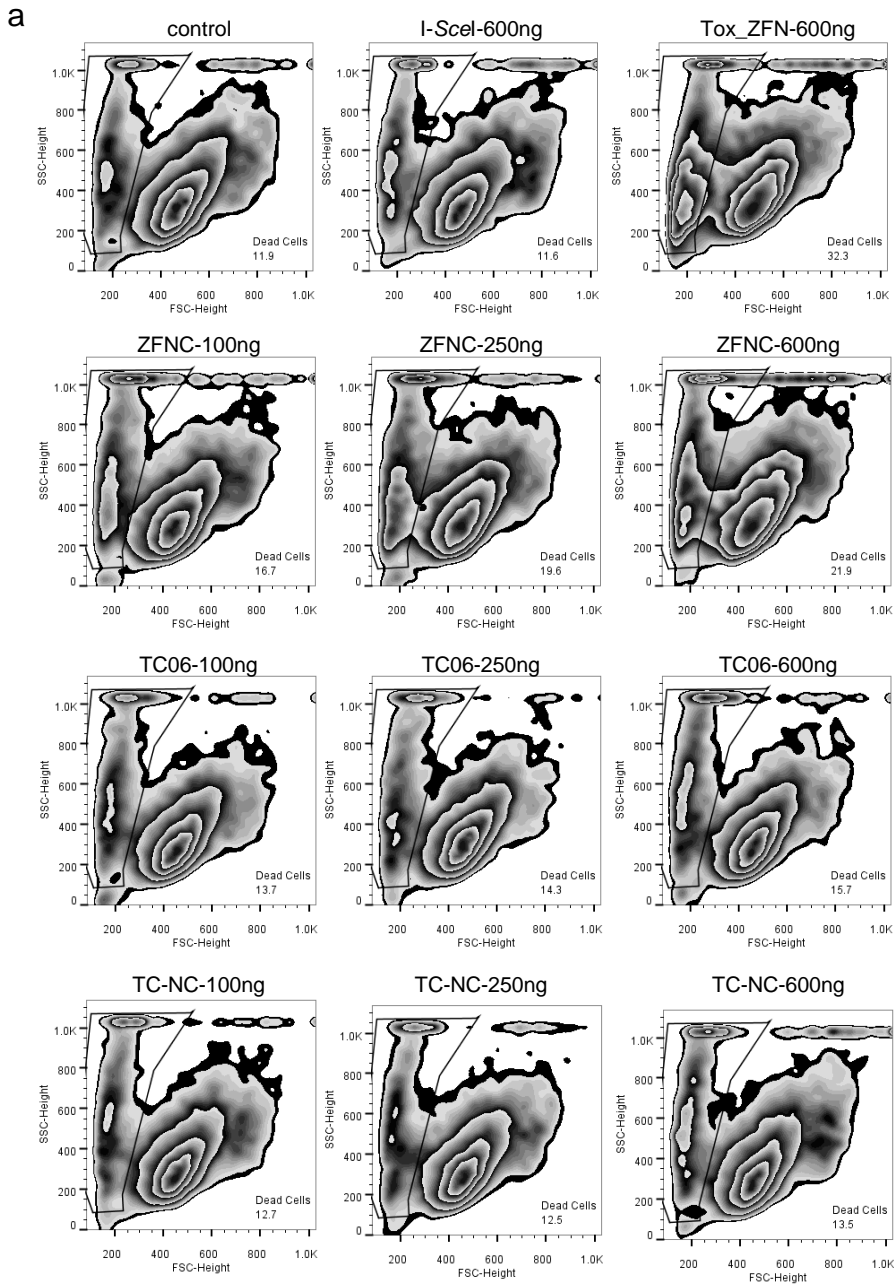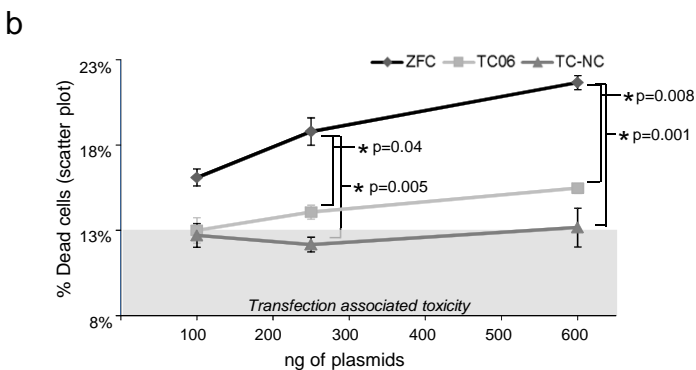

**Supplementary Figure S5. CCR5-specific designer nuclease associated toxicity. (a)** Assessment of cell death by scatter plots analysis. The scatter plots were used to determine the extent of dead cells upon transfection of designer nuclease expression vectors in HEK293T cells. The non-toxic meganuclease I-SceI and a toxic ZFN pair (GZF1N/GZF3N) equipped with WT *FokI* cleavage domain were used as controls. A representative experiment from each triplicate is shown. **(b)** Nuclease-associated toxicity. Correlation of dead cells (gated as shown in panel a) and the amounts of designer nucleases plasmids transfected. Statistically significant differences are indicated by an asterisk and the corresponding p-values, as calculated by the two tailed Student's t-test. The grey shaded area indicates the background due to transfection-associated toxicity. Data represent two independent experiments performed in triplicates. Error bars, S.E.M.

Supplementary Table S1. Target sequences of the nuclease pairs used in this study

| Nuclease ID | Nuclease pair | Target Gene | Target sequence (5'...3') <sup>1</sup>                                                | Spacer (bp) <sup>2</sup> | Cleavage (% ± SEM) <sup>3</sup> |
|-------------|---------------|-------------|---------------------------------------------------------------------------------------|--------------------------|---------------------------------|
| TC01        | L-1 + R-2     | CCR5        | 5'-GGTTTGTGGGCAACATGCTGGTCATCCTCATCCTGATAAACTGCAAAAGGCTGAAGAGC-3'                     | 15                       | 5.7% ± 0.8%                     |
| TC02        | L-1 + R-99    | CCR5        | 5'-GGTTTGTGGGCAACATGCTGGTCATCCTCATCCTGATAAACTGCAAAAGGCTGAAGAGC-3'                     | 13                       | 14.8% ± 2.1%                    |
| TC03        | L-1 + R-101   | CCR5        | 5'-GGTTTGTGGGCAACATGCTGGTCATCCTCATCCTGATAAACTGCAAAAGGCTGAAGAGC-3'                     | 12                       | 21.7% ± 2.0%                    |
| TC04        | L-98 + R-2    | CCR5        | 5'-GGTTTGTGGGCAACATGCTGGTCATCCTCATCCTGATAAACTGCAAAAGGCTGAAGAGC-3'                     | 17                       | 4.4% ± 0.7%                     |
| TC05        | L-98 + R-99   | CCR5        | 5'-GGTTTGTGGGCAACATGCTGGTCATCCTCATCCTGATAAACTGCAAAAGGCTGAAGAGC-3'                     | 15                       | 13.4% ± 0.9%                    |
| TC06        | L-98 + R-101  | CCR5        | 5'-GGTTTGTGGGCAACATGCTGGTCATCCTCATCCTGATAAACTGCAAAAGGCTGAAGAGC-3'                     | 14                       | 23.6% ± 2.5%                    |
| TC07        | L-100 + R-2   | CCR5        | 5'-GGTTTGTGGGCAACATGCTGGTCATCCTCATCCTGATAAACTGCAAAAGGCTGAAGAGC-3'                     | 18                       | 2.1% ± 1.3%                     |
| TC08        | L-100 + R-99  | CCR5        | 5'-GGTTTGTGGGCAACATGCTGGTCATCCTCATCCTGATAAACTGCAAAAGGCTGAAGAGC-3'                     | 16                       | 6.9% ± 0.5%                     |
| TC09        | L-100 + R-101 | CCR5        | 5'-GGTTTGTGGGCAACATGCTGGTCATCCTCATCCTGATAAACTGCAAAAGGCTGAAGAGC-3'                     | 15                       | 9.0% ± 1.0%                     |
| TC10        | L-140 + R-2   | CCR5        | 5'-GGTTTGTGGGCAACATGCTGGTCATCCTCATCCTGATAAACTGCAAAAGGCTGAAGAGC-3'                     | 15                       | 8.8% ± 2.0%                     |
| TC11        | L-140 + R-99  | CCR5        | 5'-GGTTTGTGGGCAACATGCTGGTCATCCTCATCCTGATAAACTGCAAAAGGCTGAAGAGC-3'                     | 13                       | 14.4% ± 1.5%                    |
| TC12        | L-140 + R-101 | CCR5        | 5'-GGTTTGTGGGCAACATGCTGGTCATCCTCATCCTGATAAACTGCAAAAGGCTGAAGAGC-3'                     | 12                       | 22.1% ± 2.4%                    |
| TC-NC       | L-1 + R-2     | CCR5        | 5'-GGTTTGTGGGCAACATGCTGGTCATCCTCATCCTGATAAACTGCAAAAGGCTGAAGAGC-3'                     | 15                       | 20.7% ± 0.3%                    |
| ZFNC        | ZFNL + ZFNR   | CCR5        | 5'-GGTTTGTGGGCAACATGCTGGTCATCCTCATCCTGATAAACTGCAAAAGGCTGAAGAGC-3'                     | 5                        | 12.8% ± 1.8%                    |
| TA01        | L-92 + R-95   | AAVS1       | 5'-TTTTATCTGTCCCTCCACCCACAGTGGGGCCACTAGGGACAGGATTGGTGACAGAAAAGC-3'                    | 18                       | 1.9% ± 1.4%                     |
| TA02        | L-92 + R-97   | AAVS1       | 5'-TTTTATCTGTCCCTCCACCCACAGTGGGGCCACTAGGGACAGGATTGGTGACAGAAAAGC-3'                    | 20                       | 19.8% ± 0.6%                    |
| TA03        | L-92 + R-136  | AAVS1       | 5'-TTTTATCTGTCCCTCCACCCACAGTGGGGCCACTAGGGACAGGATTGGTGACAGAAAAGC-3'                    | 13                       | 30.8% ± 3.2%                    |
| TA04        | L-94 + R-95   | AAVS1       | 5'-TTTTATCTGTCCCTCCACCCACAGTGGGGCCACTAGGGACAGGATTGGTGACAGAAAAGC-3'                    | 15                       | 32.1% ± 4.6%                    |
| TA05        | L-94 + R-97   | AAVS1       | 5'-TTTTATCTGTCCCTCCACCCACAGTGGGGCCACTAGGGACAGGATTGGTGACAGAAAAGC-3'                    | 17                       | 5.6% ± 0.8%                     |
| TA06        | L-94 + R-136  | AAVS1       | 5'-TTTTATCTGTCCCTCCACCCACAGTGGGGCCACTAGGGACAGGATTGGTGACAGAAAAGC-3'                    | 10                       | 22.8% ± 3.5%                    |
| TA07        | L-96 + R-95   | AAVS1       | 5'-TTTTATCTGTCCCTCCACCCACAGTGGGGCCACTAGGGACAGGATTGGTGACAGAAAAGC-3'                    | 13                       | 27.7% ± 4.0%                    |
| TA08        | L-96 + R-97   | AAVS1       | 5'-TTTTATCTGTCCCTCCACCCACAGTGGGGCCACTAGGGACAGGATTGGTGACAGAAAAGC-3'                    | 15                       | 11.5% ± 4.3%                    |
| ZFNA        | ZFNL + ZFNR   | AAVS1       | 5'-TTTTATCTGTCCCTCCACCCACAGTGGGGCCACTAGGGACAGGATTGGTGACAGAAAAGC-3'                    | 6                        | 21.6% ± 7.5%                    |
| TI-NC       | L-3 + R-4     | IL2RG       | 5'-GCTACACGTTTCGTGTTCCGAGCCGCTTTAACCACCTCTGTGGAAGTGCTCAGCATTGGAGTGAATGGAGCCACCCAAT-3' | 15                       | 3.3% ± 0.9%                     |
| TI01        | L-3 + R-4     | IL2RG       | 5'-GCTACACGTTTCGTGTTCCGAGCCGCTTTAACCACCTCTGTGGAAGTGCTCAGCATTGGAGTGAATGGAGCCACCCAAT-3' | 15                       | 2.6% ± 1.1%                     |
| TI02        | L-3 + R-170   | IL2RG       | 5'-GCTACACGTTTCGTGTTCCGAGCCGCTTTAACCACCTCTGTGGAAGTGCTCAGCATTGGAGTGAATGGAGCCACCCAAT-3' | 29                       | 0.0% ± 0.0%                     |
| TI03        | L-3 + R-172   | IL2RG       | 5'-GCTACACGTTTCGTGTTCCGAGCCGCTTTAACCACCTCTGTGGAAGTGCTCAGCATTGGAGTGAATGGAGCCACCCAAT-3' | 20                       | 1.5% ± 1.5%                     |
| TI04        | L-3 + R-174   | IL2RG       | 5'-GCTACACGTTTCGTGTTCCGAGCCGCTTTAACCACCTCTGTGGAAGTGCTCAGCATTGGAGTGAATGGAGCCACCCAAT-3' | 38                       | 0.0% ± 0.0%                     |
| TI05        | L-169 + R-4   | IL2RG       | 5'-GCTACACGTTTCGTGTTCCGAGCCGCTTTAACCACCTCTGTGGAAGTGCTCAGCATTGGAGTGAATGGAGCCACCCAAT-3' | 1                        | 0.7% ± 0.5%                     |
| TI06        | L-169 + R-170 | IL2RG       | 5'-GCTACACGTTTCGTGTTCCGAGCCGCTTTAACCACCTCTGTGGAAGTGCTCAGCATTGGAGTGAATGGAGCCACCCAAT-3' | 15                       | 0.5% ± 0.5%                     |
| TI07        | L-169 + R-172 | IL2RG       | 5'-GCTACACGTTTCGTGTTCCGAGCCGCTTTAACCACCTCTGTGGAAGTGCTCAGCATTGGAGTGAATGGAGCCACCCAAT-3' | 6                        | 0.7% ± 0.7%                     |
| TI08        | L-169 + R-174 | IL2RG       | 5'-GCTACACGTTTCGTGTTCCGAGCCGCTTTAACCACCTCTGTGGAAGTGCTCAGCATTGGAGTGAATGGAGCCACCCAAT-3' | 24                       | 0.9% ± 0.6%                     |
| TI09        | L-171 + R-4   | IL2RG       | 5'-GCTACACGTTTCGTGTTCCGAGCCGCTTTAACCACCTCTGTGGAAGTGCTCAGCATTGGAGTGAATGGAGCCACCCAAT-3' | 8                        | 4.4% ± 4.1%                     |
| TI10        | L-171 + R-170 | IL2RG       | 5'-GCTACACGTTTCGTGTTCCGAGCCGCTTTAACCACCTCTGTGGAAGTGCTCAGCATTGGAGTGAATGGAGCCACCCAAT-3' | 22                       | 3.1% ± 2.2%                     |
| TI11        | L-171 + R-172 | IL2RG       | 5'-GCTACACGTTTCGTGTTCCGAGCCGCTTTAACCACCTCTGTGGAAGTGCTCAGCATTGGAGTGAATGGAGCCACCCAAT-3' | 13                       | 7.4% ± 1.6%                     |
| TI12        | L-171 + R-174 | IL2RG       | 5'-GCTACACGTTTCGTGTTCCGAGCCGCTTTAACCACCTCTGTGGAAGTGCTCAGCATTGGAGTGAATGGAGCCACCCAAT-3' | 31                       | 1.0% ± 0.9%                     |
| TI13        | L-173 + R-170 | IL2RG       | 5'-GCTACACGTTTCGTGTTCCGAGCCGCTTTAACCACCTCTGTGGAAGTGCTCAGCATTGGAGTGAATGGAGCCACCCAAT-3' | 4                        | 1.4% ± 1.4%                     |
| TI14        | L-173 + R-174 | IL2RG       | 5'-GCTACACGTTTCGTGTTCCGAGCCGCTTTAACCACCTCTGTGGAAGTGCTCAGCATTGGAGTGAATGGAGCCACCCAAT-3' | 13                       | 35.2% ± 3.3%                    |
| ZFNI        | ZFNL + ZFNR   | IL2RG       | 5'-GCTACACGTTTCGTGTTCCGAGCCGCTTTAACCACCTCTGTGGAAGTGCTCAGCATTGGAGTGAATGGAGCCACCCAAT-3' | 5                        | 26.1% ± 2.2%                    |

<sup>1</sup> The respective nucleases target sites are highlighted in bold and the CpG dinucleotides within the targets are underlined

<sup>2</sup> In shaded the optimal spacer length.

<sup>3</sup> Average percentage of modified alleles indicated as result of three independent experiments. SEM: standard error of the mean



Supplementary Table S2. Target sites in *CCR5* and *CCR2*

| Nuclease ID                            | Nucleotide differences |      |       | Target sequence (5'...3') <sup>2</sup>                                               | Spacer (bp) | Cleavage (%)   |                |
|----------------------------------------|------------------------|------|-------|--------------------------------------------------------------------------------------|-------------|----------------|----------------|
|                                        | Total                  | Left | Right |                                                                                      |             | at <i>CCR5</i> | at <i>CCR2</i> |
| <i>CCR5</i> -target locus              |                        |      |       | 5'-GGTTTTGTGGGCAACATGCTGGTCATCCTCATCCTGATAAACTGCAAAAAGGCTGAAGAGC-3'                  |             |                |                |
| <i>CCR2</i> -target locus <sup>1</sup> |                        |      |       | 5'-GGTTTTGTGGGCAACATGCTGGTC <b>g</b> TCCTCATC <b>t</b> TaATAAACTGCAAAAaGCTGAAGtGC-3' |             |                |                |
| TC01                                   | 2                      | 0    | 2     | 5'-GGTTTTGTGGGCAACATGCTGGTCATCCTCATC <b>C</b> TgATAAACTGCAAAA <b>g</b> GCTGAAGaGC-3' | 15          | 5.7%           | 1.0%           |
| TC02                                   | 1                      | 0    | 1     | 5'-GGTTTTGTGGGCAACATGCTGGTCATCCTCATC <b>C</b> TgATAAACTGCAAAA <b>g</b> GCTGAAGaGC-3' | 13          | 14.8%          | 13.3%          |
| TC03                                   | 1                      | 0    | 1     | 5'-GGTTTTGTGGGCAACATGCTGGTCATCCTCATC <b>C</b> TgATAAACTGCAAAA <b>g</b> GCTGAAGaGC-3' | 12          | 21.7%          | 10.8%          |
| TC04                                   | 2                      | 0    | 2     | 5'-GGTTTTGTGGGCAACATGCTGGTCATCCTCATC <b>C</b> TgATAAACTGCAAAA <b>g</b> GCTGAAGaGC-3' | 17          | 4.4%           | 2.3%           |
| TC05                                   | 1                      | 0    | 1     | 5'-GGTTTTGTGGGCAACATGCTGGTCATCCTCATC <b>C</b> TgATAAACTGCAAAA <b>g</b> GCTGAAGaGC-3' | 15          | 13.4%          | 5.1%           |
| TC06                                   | 1                      | 0    | 1     | 5'-GGTTTTGTGGGCAACATGCTGGTCATCCTCATC <b>C</b> TgATAAACTGCAAAA <b>g</b> GCTGAAGaGC-3' | 14          | 23.6%          | 13.1%          |
| TC07                                   | 2                      | 0    | 2     | 5'-GGTTTTGTGGGCAACATGCTGGTCATCCTCATC <b>C</b> TgATAAACTGCAAAA <b>g</b> GCTGAAGaGC-3' | 18          | 2.1%           | 4.4%           |
| TC08                                   | 1                      | 0    | 1     | 5'-GGTTTTGTGGGCAACATGCTGGTCATCCTCATC <b>C</b> TgATAAACTGCAAAA <b>g</b> GCTGAAGaGC-3' | 16          | 6.9%           | 2.9%           |
| TC09                                   | 1                      | 0    | 1     | 5'-GGTTTTGTGGGCAACATGCTGGTCATCCTCATC <b>C</b> TgATAAACTGCAAAA <b>g</b> GCTGAAGaGC-3' | 15          | 9.0%           | 1.3%           |
| TC10                                   | 2                      | 0    | 2     | 5'-GGTTTTGTGGGCAACATGCTGGTCATCCTCATC <b>C</b> TgATAAACTGCAAAA <b>g</b> GCTGAAGaGC-3' | 15          | 8.8%           | 2.1%           |
| TC11                                   | 1                      | 0    | 1     | 5'-GGTTTTGTGGGCAACATGCTGGTCATCCTCATC <b>C</b> TgATAAACTGCAAAA <b>g</b> GCTGAAGaGC-3' | 13          | 14.4%          | 15.4%          |
| TC12                                   | 1                      | 0    | 1     | 5'-GGTTTTGTGGGCAACATGCTGGTCATCCTCATC <b>C</b> TgATAAACTGCAAAA <b>g</b> GCTGAAGaGC-3' | 12          | 22.1%          | 15.1%          |
| TC-NC                                  | 2                      | 0    | 2     | 5'-GGTTTTGTGGGCAACATGCTGGTCATCCTCATC <b>C</b> TgATAAACTGCAAAA <b>g</b> GCTGAAGaGC-3' | 15          | 20.7%          | 3.3%           |
| ZFNC                                   | 2                      | 1    | 1     | 5'-GGTTTTGTGGGCAACATGCTGGTCATCCTCATC <b>C</b> TgATAAACTGCAAAA <b>g</b> GCTGAAGaGC-3' | 5           | 12.8%          | 18.3%          |

<sup>1</sup> Differences to *CCR5* are highlighted in lower case bold letters.

<sup>2</sup> The *CCR5*-specific nuclease target sites are highlighted in bold. Letters in lower case represent nucleotides not conserved in *CCR2*.

Supplementary Table S3. Off-target sites of *CCR5*- and *AAVS1*-specific zinc finger nucleases predicted by PROGNOS tool

| Nuclease ID | PROGNOS prediction rankings |              | Nucleotide differences |      |             | Closest Gene <sup>1</sup> | chromosome | Match Type   | Left target (5'-->3') <sup>2</sup> | Spacer (bp)  | Right target (5'-->3') <sup>2</sup> | NHEJ detected | References |
|-------------|-----------------------------|--------------|------------------------|------|-------------|---------------------------|------------|--------------|------------------------------------|--------------|-------------------------------------|---------------|------------|
|             | Homology                    | Conserved Gs | Total                  | Left | Right       |                           |            |              |                                    |              |                                     |               |            |
| ZFNC        | 1                           | 1            | 0                      | 0    | 0           | <i>CCR5</i>               | chr3       | L-5-R        | GTCATCCTCATC                       | 5            | AAACTGCAAAAAG                       | Yes           | 26, 27, 51 |
|             | 2                           | 5            | 2                      | 1    | 1           | <i>CCR2</i>               | chr3       | L-5-R        | GTCTGTCCTCATC                      | 5            | AAACTGCAAAAa                        | Yes           | 26, 27, 51 |
|             | 3                           | 45           | 3                      | 2    | 1           | <i>BTBD10</i>             | chr11      | L-5-R        | GTtTTCCTCATC                       | 5            | AAACTGCAAAAat                       | Yes           | 27, 51     |
|             | 4                           | 16           | 3                      | 2    | 1           | <i>SYT10</i>              | chr12      | L-6-R        | GTCATCCcaATC                       | 6            | AAACTGaaAAAAG                       | No            | 27         |
|             | 5                           | 2            | 3                      | 2    | 1           | <i>GALNT13</i>            | chr2       | R-5-L        | CTTeTGCTGTTT                       | 5            | GcTGAGGATGAC                        | No            | 27         |
|             | 6                           | 3            | 3                      | 1    | 2           | <i>DGKK</i>               | chrX       | L-5-R        | cTCATCCTCATC                       | 5            | AcAaTGCAAAAAG                       | No            | 27         |
|             | 7                           | 46           | 3                      | 2    | 1           | <i>CEP112</i>             | chr17      | R-5-L        | gTTTtTGcAGTtC                      | 5            | GATGaaGATGAC                        | Yes           | 27         |
|             | 8                           | 4            | 3                      | 1    | 2           | <i>PSAT1</i>              | chr9       | R-6-L        | CTTTTgCAGTcT                       | 6            | GtTGAGGtTGAC                        | Yes           | 27         |
|             | 9                           | 26           | 4                      | 3    | 1           | <i>CWF19L2</i>            | chr11      | R-5-L        | CcTTTtCAGeTT                       | 5            | GATGAtGATGAC                        | N/A           | N/A        |
|             | 10                          | 6            | 4                      | 3    | 1           | <i>LPCAT2</i>             | chr16      | R-6-L        | CTTeagCtGTTT                       | 6            | GATGAGGATGgC                        | No            | 51         |
|             | 11                          | 195          | 4                      | 3    | 1           | <i>ZNF587</i>             | chr19      | L-6-R        | GTaATCaTCAGc                       | 6            | AcACTGCAAAAAG                       | No            | 51         |
|             | 12                          | 196          | 4                      | 1    | 3           | <i>ZNF417</i>             | chr19      | R-6-L        | CTTTTgCAGTgT                       | 6            | GcTGAtGATtAC                        | No            | 51         |
|             | 13                          | 27           | 4                      | 1    | 3           | <i>SPTB</i>               | chr14      | L-6-R        | GTCATCCgCATC                       | 6            | gAACTGgAAAAa                        | No            | 27         |
|             | 14                          | 417          | 4                      | 1    | 3           | <i>LOC100507217</i>       | chr15      | R-6-L        | tTTTtTGcAGTtT                      | 6            | tATGcGtATGAC                        | No            | 51         |
|             | 15                          | 28           | 4                      | 3    | 1           | <i>TMEM114</i>            | chr16      | R-5-L        | CTTeTaCtGTTT                       | 5            | GATGAtGATGAC                        | N/A           | N/A        |
|             | 16                          | 7            | 4                      | 1    | 3           | <i>TMOD1</i>              | chr9       | L-5-R        | GTCATCCTCctC                       | 5            | AaTcTGaGAAAG                        | No            | 51         |
|             | 17                          | 197          | 4                      | 1    | 3           | <i>TACR3</i>              | chr4       | L-5-R        | GTCATCtTCATC                       | 5            | AAACTGtAAAGt                        | Yes           | 27, 51     |
|             | 18                          | 8            | 4                      | 1    | 3           | <i>ACOXL</i>              | chr2       | R-5-L        | CTTTTgCAGTgT                       | 5            | GATGgGgTAgAC                        | No            | 51         |
|             | 19                          | 9            | 4                      | 3    | 1           | <i>MTM1</i>               | chrX       | R-6-L        | CTgTTGcTgTgT                       | 6            | GATGAGGATGAT                        | No            | 51         |
|             | 20                          | 198          | 4                      | 1    | 3           | <i>PCSK2</i>              | chr20      | R-5-L        | CTTeTGcAGTtT                       | 5            | GATGAcAtTGAC                        | N/A           | N/A        |
|             | 21                          | 29           | 4                      | 1    | 3           | <i>PIWIL2</i>             | chr8       | L-5-R        | GTCATCCTCATA                       | 5            | AAACTGccttAG                        | No            | 27         |
|             | 22                          | 10           | 4                      | 1    | 3           | <i>IFLTD1</i>             | chr12      | L-6-R        | cTCATCCTCATC                       | 6            | AaggGCAAAAAG                        | No            | 51         |
|             | 23                          | 30           | 4                      | 3    | 1           | <i>NPAS3</i>              | chr14      | R-5-L        | CTTTgGCAGaTa                       | 5            | GATGAGcATGAC                        | N/A           | N/A        |
|             | 24                          | 31           | 4                      | 3    | 1           | <i>MAP4</i>               | chr3       | L-6-R        | GcATCCTCAGg                        | 6            | AAACTGCAAcAG                        | No            | N/A        |
|             | 25                          | 32           | 4                      | 1    | 3           | <i>SLC4A8</i>             | chr12      | R-6-L        | CTTTTgCATtTT                       | 6            | GATGAGGATtta                        | No            | 27         |
|             | 26                          | 199          | 4                      | 3    | 1           | <i>DAB1</i>               | chr1       | L-5-R        | aTCATCCTCAGt                       | 5            | AAACTGCAAAAat                       | N/A           | N/A        |
|             | 27                          | 200          | 4                      | 1    | 3           | <i>PTPRG</i>              | chr3       | R-6-L        | CaTTTgCAGTtT                       | 6            | GATGAtGeTtAC                        | N/A           | N/A        |
|             | 28                          | 11           | 4                      | 1    | 3           | <i>WDPCP</i>              | chr2       | L-6-R        | GTCATCCTCAGc                       | 6            | AcACaGgAAAAG                        | No            | 51         |
|             | 29                          | 33           | 4                      | 3    | 1           | <i>KCNB2</i>              | chr8       | L-5-R        | aTgtTCCTCATC                       | 5            | AAACTGCAAAAtG                       | Yes           | 27, 51     |
|             | 30                          | 34           | 4                      | 1    | 3           | <i>SYNDIG1L</i>           | chr14      | L-6-R        | GTCATCaTCATC                       | 6            | tAcAGCAAAAAG                        | N/A           | N/A        |
|             | 31                          | 12           | 4                      | 3    | 1           | <i>WWOX</i>               | chr16      | R-6-L        | CTTTAgCAaTTg                       | 6            | GAGGAGGATGAC                        | No            | 27         |
|             | 32                          | 201          | 4                      | 3    | 1           | <i>MIR100HG</i>           | chr11      | L-5-R        | cTgAgcCTCATC                       | 5            | AAACTGCAAAAac                       | N/A           | N/A        |
|             | 33                          | 13           | 4                      | 3    | 1           | <i>CSNK1G3</i>            | chr5       | L-5-R        | GeCtTCCcCATC                       | 5            | AAAgTGCAAAAAG                       | Yes           | 51         |
| ZFNA        | 1                           | 1            | 0                      | 0    | 0           | <i>AAVS1</i>              | chr19      | R-6-L        | ACCCcACAGTGG                       | 6            | TAGGGACAGGAT                        | Yes           | 21         |
|             | N/A                         | N/A          | 6                      | 4    | 2           | <i>CHRAC1</i>             | chr8       | R-6-L        | cTCCTGgCCcAg                       | 6            | CCACTGTGGGtg                        | Yes           | 21         |
|             | 1641                        | 662          | 6                      | 3    | 3           | <i>ANXA8L2</i>            | chr10      | L-6-R        | caCCcACAGgGG                       | 6            | cAGGGcCAGGAc                        | No            | 21         |
|             | 19                          | 31           | 4                      | 3    | 1           | <i>RGS12</i>              | chr4       | R-5-L        | tTCCTGTCCtTt                       | 5            | CCACTGTGGGtT                        | N/A           | 21         |
|             | N/A                         | N/A          | 5                      | 5    | 0           | <i>ATRNL1</i>             | chr10      | L-5-R        | caCCcACAGatt                       | 5            | TAGGGACAGGAT                        | Yes           | 21         |
|             | 29                          | 5            | 4                      | 2    | 2           | <i>BEGAIN</i>             | chr14      | R-6-L        | gTCCTGTCCCTg                       | 6            | CCAcAGTGGGgG                        | Yes           | 21         |
|             | 2                           | 2            | 2                      | 1    | 1           | <i>LINC00548</i>          | chr13      | L-6-R        | ACCCcACAGTAG                       | 6            | TAGGGACAGGAa                        | Yes           | N/A        |
|             | 3                           | 4            | 3                      | 1    | 2           | <i>LOC100130539</i>       | chr10      | L-5-R        | AcGCCACAGTGG                       | 5            | cAGGGACAGGtT                        | No            | N/A        |
|             | 4                           | 10           | 4                      | 3    | 1           | <i>LHPP</i>               | chr10      | L-5-R        | tCCcAcACAGeGG                      | 5            | TAGGGcCAGGAT                        | No            | N/A        |
|             | 5                           | 11           | 4                      | 3    | 1           | <i>SAG</i>                | chr2       | L-6-R        | ACCCcAcTtGT                        | 6            | TAGGcACAGGAT                        | No            | N/A        |
|             | 7                           | 25           | 4                      | 3    | 1           | <i>FOXP1</i>              | chr3       | L-5-R        | gCCTcCCAGTGG                       | 5            | TAGAcACAGGAT                        | No            | N/A        |
|             | 16                          | 3            | 4                      | 1    | 3           | <i>H19</i>                | chr11      | L-5-R        | tCCcCAGTGG                         | 5            | gAGGGcCAGGAg                        | Yes           | N/A        |
|             | 30                          | 6            | 4                      | 2    | 2           | <i>SYNPO</i>              | chr5       | L-5-R        | tCCcCACaATGG                       | 5            | TtGGGcCAGGAT                        | No            | N/A        |
|             | 32                          | 7            | 4                      | 2    | 2           | <i>MEGF6</i>              | chr1       | L-5-R        | ACCCcGcAGAGG                       | 5            | gAGGGACAGGgT                        | No            | N/A        |
|             | 36                          | 8            | 4                      | 2    | 2           | <i>TK2</i>                | chr16      | L-5-R        | tCCcCACAcTGG                       | 5            | TAGGGgCAGGAg                        | No            | N/A        |
|             | 42                          | 9            | 4                      | 2    | 2           | <i>ZNF521</i>             | chr18      | L-6-R        | ACCCcACAGatG                       | 6            | TgGGGcCAGGAT                        | No            | N/A        |
|             | 8                           | 26           | 4                      | 3    | 1           | <i>CCDC33</i>             | chr15      | R-6-L        | AccCTGTcTCTg                       | 6            | CCACTGTGGGaT                        | No            | N/A        |
|             | 9                           | 27           | 4                      | 3    | 1           | <i>GAS2L3</i>             | chr12      | R-6-L        | AaaCTGTCCgTA                       | 6            | CCAtTGTGGGgT                        | No            | N/A        |
|             | 10                          | 28           | 4                      | 3    | 1           | <i>MIR4299</i>            | chr11      | R-6-L        | AacCTGctCCTA                       | 6            | CCACTGTGGGgT                        | No            | N/A        |
|             | 11                          | 12           | 4                      | 3    | 1           | <i>SLC6A19</i>            | chr5       | R-5-L        | AgCCTGTgCCTc                       | 5            | CCcCTGTGGGgT                        | N/A           | N/A        |
|             | 13                          | 14           | 4                      | 1    | 3           | <i>RAB11FIP2</i>          | chr10      | L-5-R        | ACCCcTcAGTGG                       | 5            | TgGGGtCAGaAT                        | No            | N/A        |
| 14          | 15                          | 4            | 1                      | 3    | <i>NMT2</i> | chr10                     | R-5-L      | ATCCtGTCCCTc | 5                                  | CCcCTGTGAGGc | No                                  | N/A           |            |
| 17          | 16                          | 4            | 1                      | 3    | <i>CLU</i>  | chr8                      | L-5-R      | ACCCcACAGTGA | 5                                  | TAGGtCtGGAT  | No                                  | N/A           |            |
| 21          | 17                          | 4            | 1                      | 3    | <i>FRS3</i> | chr6                      | L-5-R      | ACCCcACAGTGA | 5                                  | aAGAGaaAGGAT | No                                  | N/A           |            |

<sup>1</sup> Lines highlighted in grey represent experimentally validated off-target sites (references indicated).

<sup>2</sup> Differences to *CCR5* or *AAVS1* are highlighted in lower case bold letters.

Supplementary Table S4. Off-target sites of CCR5- and AAVS1-specific TALENs predicted by PROGNOS tool

| Nuclease ID | Ranking <sup>1</sup> | Nucleotide differences |      |       | Closest Gene        | chromosome | Match Type | Left target (5'-->3') <sup>2</sup>                                                         | Spacer (bp) | Right target (5'-->3') <sup>2</sup>                                                       |
|-------------|----------------------|------------------------|------|-------|---------------------|------------|------------|--------------------------------------------------------------------------------------------|-------------|-------------------------------------------------------------------------------------------|
|             |                      | Total                  | Left | Right |                     |            |            |                                                                                            |             |                                                                                           |
| TC-NC       | 1                    | 0                      | 0    | 0     | <i>CCR5</i>         | chr3       | L-15-R     | TGTGGGCAACATGCTGGTC                                                                        | 15          | AACTGCAAAAAGGCTGAAGA                                                                      |
|             | 2                    | 7                      | 2    | 5     | <i>AUTS2</i>        | chr7       | L-27-R     | TG <b>ag</b> GGG <b>C</b> ACATGCTGGTC                                                      | 27          | A <b>Ag</b> T <b>Gg</b> A <b>c</b> AGG <b>G</b> TGAAGA                                    |
|             | 3                    | 9                      | 4    | 5     | <i>CDH8</i>         | chr16      | R-11-L     | TC <b>cc</b> CA <b>c</b> CTTT <b>T</b> GG <b>ag</b> T                                      | 11          | G <b>ACC</b> AG <b>CA</b> T <b>TT</b> T <b>Ggt</b> t <b>AA</b>                            |
|             | 4                    | 10                     | 5    | 5     | <i>CAPZA3</i>       | chr12      | L-15-L     | TG <b>g</b> GGG <b>Ca</b> a <b>T</b> ACTG <b>T</b> C                                       | 15          | G <b>AC</b> t <b>T</b> GCATG <b>T</b> T <b>ag</b> a <b>C</b> ACA                          |
|             | 5                    | 9                      | 4    | 5     | <i>NRXN1</i>        | chr2       | L-16-L     | T <b>a</b> TGG <b>t</b> C <b>ag</b> CATGCTGG <b>a</b> C                                    | 16          | G <b>cc</b> AG <b>C</b> AG <b>G</b> c <b>TG</b> C <b>G</b> C <b>T</b> CA                  |
|             | 6                    | 10                     | 5    | 5     | <i>HMGCLL1</i>      | chr6       | L-12-L     | TGT <b>G</b> a <b>c</b> C <b>a</b> c <b>C</b> c <b>T</b> c <b>T</b> GG <b>T</b> C          | 12          | <b>a</b> CA <b>a</b> t <b>C</b> ATG <b>T</b> T <b>c</b> CA <b>CA</b>                      |
|             | 7                    | 10                     | 5    | 5     | <i>PADI3</i>        | chr1       | R-28-L     | TC <b>c</b> T <b>Ac</b> C <b>CT</b> T <b>g</b> T <b>a</b> a <b>C</b> AG <b>T</b> T         | 28          | G <b>AG</b> C <b>T</b> GCATG <b>T</b> g <b>CC</b> CA <b>T</b> A                           |
|             | 8                    | 9                      | 5    | 4     | <i>AOAH</i>         | chr7       | L-25-R     | T <b>G</b> T <b>a</b> G <b>a</b> CAACATG <b>C</b> a <b>T</b> G <b>C</b>                    | 25          | A <b>t</b> C <b>T</b> G <b>C</b> t <b>AA</b> AG <b>G</b> C <b>T</b> AA <b>AA</b>          |
|             | 9                    | 9                      | 5    | 4     | <i>NRN1</i>         | chr6       | R-30-L     | T <b>C</b> T <b>c</b> C <b>AG</b> g <b>CT</b> TT <b>T</b> t <b>Ca</b> A <b>ATT</b>         | 30          | G <b>ACC</b> AG <b>CA</b> T <b>TT</b> T <b>c</b> T <b>C</b> c <b>CA</b>                   |
|             | 10                   | 10                     | 5    | 5     | <i>PRPS2</i>        | chrX       | L-30-L     | TGTGG <b>c</b> CA <b>a</b> t <b>AT</b> G <b>T</b> G <b>t</b> og                            | 30          | G <b>ACC</b> T <b>GC</b> ATG <b>c</b> T <b>t</b> C <b>t</b> C <b>ag</b> A                 |
|             | 11                   | 10                     | 5    | 5     | <i>LRRC8D</i>       | chr1       | L-13-R     | T <b>c</b> TGGG <b>CA</b> CA <b>T</b> ag <b>T</b> G <b>a</b> T <b>a</b>                    | 13          | A <b>AT</b> T <b>t</b> AA <b>AA</b> AG <b>C</b> T <b>GA</b> AA <b>A</b>                   |
|             | 12                   | 9                      | 5    | 4     | <i>LIPC</i>         | chr15      | L-20-L     | T <b>t</b> TG <b>tt</b> C <b>AT</b> c <b>t</b> TG <b>T</b> GG <b>T</b> C                   | 20          | G <b>ACC</b> g <b>G</b> C <b>G</b> T <b>GT</b> G <b>CC</b> C <b>C</b> CA                  |
|             | 13                   | 10                     | 5    | 5     | <i>PDE9A</i>        | chr21      | L-19-L     | TGTGG <b>t</b> C <b>t</b> c <b>AT</b> G <b>T</b> G <b>c</b> T <b>G</b>                     | 19          | G <b>tt</b> C <b>AG</b> G <b>A</b> c <b>TT</b> G <b>CC</b> CC <b>CA</b>                   |
|             | 14                   | 9                      | 4    | 5     | <i>CCR8</i>         | chr3       | L-15-R     | T <b>c</b> TGGG <b>a</b> AA <b>C</b> ag <b>c</b> TGG <b>T</b> C                            | 15          | <b>gt</b> C <b>T</b> G <b>CA</b> AG <b>a</b> AG <b>T</b> G <b>AG</b> G <b>A</b>           |
|             | 15                   | 9                      | 4    | 5     | <i>C11orf82</i>     | chr11      | R-15-R     | T <b>a</b> T <b>T</b> C <b>AG</b> C <b>aa</b> TTG <b>C</b> AG <b>T</b> T                   | 15          | <b>c</b> ACT <b>G</b> C <b>t</b> AA <b>AG</b> G <b>C</b> T <b>GA</b> AGA                  |
|             | N/A <sup>3</sup>     | 2                      | 0    | 2     | <i>CCR2</i>         | chr3       | L-15-R     | TGTGGGCAACATGCTGGTC                                                                        | 15          | AACTGCAAAAAGCTGAAGT                                                                       |
| TC06        | 1                    | 0                      | 0    | 0     | <i>CCR5</i>         | chr3       | L-14-R     | TTTGTGGGCAACATGCTGG                                                                        | 14          | ATAAACTGCAAAAAGGCTGA                                                                      |
|             | 2                    | 1                      | 0    | 1     | <i>CCR2</i>         | chr3       | L-14-R     | TTTGTGGGCAACATGCTGG                                                                        | 14          | ATAAACTGCAAAAAGCTGA                                                                       |
|             | 3                    | 9                      | 5    | 4     | <i>AOAH</i>         | chr7       | L-24-R     | <b>c</b> T <b>T</b> G <b>T</b> a <b>G</b> a <b>CA</b> ACATG <b>C</b> a <b>T</b> G          | 24          | <b>t</b> T <b>A</b> A <b>C</b> T <b>G</b> C <b>t</b> AA <b>AG</b> G <b>C</b> T <b>a</b> A |
|             | 4                    | 8                      | 5    | 3     | <i>SFMBT2</i>       | chr10      | L-11-L     | TTTGGG <b>G</b> a <b>AA</b> CA <b>T</b> G <b>a</b> T <b>G</b> a                            | 11          | C <b>C</b> A <b>t</b> C <b>AT</b> G <b>T</b> a <b>t</b> CC <b>C</b> AC <b>AAA</b>         |
|             | 5                    | 10                     | 5    | 5     | <i>FAM84A</i>       | chr2       | L-21-L     | TT <b>g</b> a <b>T</b> GGG <b>CA</b> c <b>CA</b> a <b>C</b> TGG                            | 21          | <b>a</b> C <b>AG</b> C <b>G</b> a <b>G</b> T <b>T</b> G <b>CC</b> CA <b>AG</b>            |
|             | 6                    | 10                     | 5    | 5     | <i>TBL1X</i>        | chrX       | L-18-L     | T <b>a</b> a <b>G</b> T <b>AG</b> G <b>CA</b> CA <b>T</b> c <b>T</b> G <b>t</b>            | 18          | C <b>t</b> A <b>t</b> C <b>t</b> T <b>T</b> G <b>CC</b> CA <b>AAAA</b>                    |
|             | 7                    | 10                     | 5    | 5     | <i>LOC100422737</i> | chr6       | L-15-L     | TTT <b>G</b> T <b>AG</b> G <b>C</b> g <b>AC</b> ATG <b>a</b> T <b>cc</b>                   | 15          | C <b>C</b> A <b>g</b> T <b>GT</b> T <b>G</b> g <b>CC</b> CA <b>AAAA</b>                   |
|             | 8                    | 10                     | 5    | 5     | <i>CAPZA3</i>       | chr12      | L-19-L     | TTTGGGG <b>Ca</b> a <b>AT</b> ACTG <b>t</b>                                                | 19          | C <b>tt</b> G <b>C</b> ATG <b>T</b> T <b>ag</b> a <b>C</b> AC <b>AAA</b>                  |
|             | 9                    | 9                      | 5    | 4     | <i>LOC728084</i>    | chr12      | L-17-R     | T <b>c</b> TG <b>AG</b> G <b>CA</b> CA <b>T</b> c <b>T</b> a <b>c</b>                      | 17          | A <b>T</b> a <b>G</b> ACT <b>GC</b> a <b>CA</b> AG <b>ag</b> T <b>G</b> A                 |
|             | 10                   | 8                      | 3    | 5     | <i>LOC283038</i>    | chr10      | L-17-L     | TTT <b>G</b> AGG <b>G</b> a <b>AG</b> ATG <b>T</b> GG                                      | 17          | <b>g</b> C <b>A</b> c <b>AT</b> G <b>T</b> T <b>G</b> a <b>C</b> AC <b>a</b> C            |
|             | 11                   | 10                     | 5    | 5     | <i>CHADL</i>        | chr22      | L-15-L     | TT <b>t</b> TGGG <b>Ca</b> c <b>CA</b> AG <b>Ca</b> G <b>t</b>                             | 15          | C <b>C</b> AG <b>gg</b> T <b>GT</b> T <b>t</b> CC <b>C</b> AG <b>a</b> C                  |
|             | 12                   | 8                      | 5    | 3     | <i>TRMT44</i>       | chr4       | L-22-L     | TTT <b>G</b> AGG <b>G</b> g <b>g</b> A <b>a</b> ATG <b>T</b> t <b>G</b>                    | 22          | C <b>C</b> AG <b>C</b> G <b>T</b> G <b>T</b> G <b>CC</b> CA <b>CA</b>                     |
|             | 13                   | 9                      | 4    | 5     | <i>HS3ST5</i>       | chr6       | R-18-L     | T <b>C</b> t <b>c</b> CC <b>T</b> t <b>T</b> G <b>C</b> AG <b>T</b> T <b>A</b> T           | 18          | C <b>C</b> AG <b>C</b> a <b>t</b> g <b>T</b> G <b>att</b> CA <b>CA</b> A                  |
|             | 14                   | 10                     | 5    | 5     | <i>NLGN1</i>        | chr3       | L-22-L     | TT <b>t</b> ca <b>AG</b> C <b>ct</b> C <b>AT</b> G <b>C</b> T <b>G</b>                     | 22          | C <b>C</b> A <b>t</b> C <b>AT</b> G <b>T</b> a <b>t</b> t <b>C</b> CA <b>CA</b> G         |
|             | 15                   | 8                      | 4    | 4     | <i>LOC100133091</i> | chr7       | R-25-L     | TC <b>AG</b> C <b>t</b> T <b>t</b> c <b>at</b> C <b>AG</b> T <b>T</b> A <b>T</b>           | 25          | C <b>C</b> cc <b>CA</b> T <b>GT</b> T <b>G</b> CC <b>C</b> AG <b>Ag</b>                   |
|             | 16                   | 10                     | 5    | 5     | <i>RALYL</i>        | chr8       | L-19-L     | TTT <b>G</b> ca <b>GG</b> t <b>AA</b> CA <b>T</b> G <b>a</b> T <b>G</b>                    | 19          | C <b>C</b> A <b>a</b> T <b>a</b> T <b>t</b> T <b>G</b> CC <b>a</b> AAA                    |
| TA04        | 1                    | 0                      | 0    | 0     | <i>AAVS1</i>        | chr19      | L-15-R     | TCTGTCCCTCCACCCAC                                                                          | 15          | GACAGGATTGGTGACAGAA                                                                       |
|             | 2                    | 7                      | 4    | 3     | <i>SHANK3</i>       | chr22      | L-18-R     | TCTG <b>ct</b> CCCC <b>C</b> ACCC <b>C</b> c                                               | 18          | G <b>AC</b> t <b>GG</b> AG <b>TGG</b> G <b>AC</b> AGAA                                    |
|             | 3                    | 8                      | 5    | 3     | <i>MRM1</i>         | chr17      | L-24-L     | TC <b>T</b> G <b>CC</b> CC <b>aa</b> C <b>ACT</b> CC <b>ag</b>                             | 24          | G <b>GG</b> GG <b>TGG</b> AG <b>GG</b> AG <b>AG</b> A                                     |
|             | 4                    | 8                      | 5    | 3     | <i>LOC283867</i>    | chr16      | L-21-L     | T <b>g</b> TG <b>T</b> CC <b>CT</b> CC <b>C</b> t <b>tt</b> g <b>AC</b>                    | 21          | G <b>T</b> GGG <b>T</b> cc <b>AG</b> GGG <b>AC</b> a <b>T</b> a                           |
|             | 5                    | 8                      | 4    | 4     | <i>SERPINE1</i>     | chr7       | L-24-R     | TC <b>a</b> G <b>c</b> Ca <b>CC</b> a <b>CC</b> ACCC <b>CA</b> C                           | 24          | G <b>ACA</b> a <b>G</b> T <b>T</b> G <b>T</b> G <b>AC</b> a <b>CA</b> A                   |
|             | 6                    | 8                      | 4    | 4     | <i>LOC100144595</i> | chr2       | L-26-R     | T <b>C</b> T <b>t</b> C <b>a</b> CC <b>CT</b> CC <b>ct</b> C <b>t</b> C                    | 26          | G <b>AC</b> AG <b>G</b> a <b>T</b> GG <b>T</b> G <b>ag</b> t <b>ag</b> A                  |
|             | 7                    | 8                      | 4    | 4     | <i>RAB4B-EGLN2</i>  | chr19      | L-10-L     | T <b>C</b> T <b>a</b> T <b>CC</b> CC <b>CC</b> a <b>CC</b> C <b>C</b> c                    | 10          | a <b>T</b> GGG <b>Ca</b> AGG <b>GG</b> Ca <b>G</b> A                                      |
|             | 8                    | 9                      | 5    | 4     | <i>CDKL5</i>        | chrX       | L-13-R     | <b>c</b> T <b>t</b> T <b>CC</b> CT <b>C</b> t <b>AC</b> c <b>t</b> C <b>c</b> C            | 13          | G <b>tt</b> AG <b>G</b> c <b>T</b> GG <b>T</b> G <b>AG</b> AGAA                           |
|             | 9                    | 10                     | 5    | 5     | <i>HECW1</i>        | chr7       | L-27-R     | <b>c</b> T <b>t</b> T <b>CC</b> CT <b>CC</b> C <b>t</b> CC <b>C</b> c                      | 27          | G <b>AC</b> AG <b>G</b> T <b>T</b> T <b>G</b> T <b>G</b> t <b>C</b> AG <b>tg</b>          |
|             | 10                   | 10                     | 5    | 5     | <i>CPN1</i>         | chr10      | L-11-R     | <b>c</b> C <b>a</b> c <b>T</b> CC <b>CT</b> CC <b>CA</b> CC <b>CA</b> C                    | 11          | <b>a</b> A <b>t</b> AG <b>G</b> AT <b>T</b> G <b>G</b> g <b>G</b> C <b>AG</b> G <b>A</b>  |
|             | 11                   | 10                     | 5    | 5     | <i>KIAA0556</i>     | chr16      | R-21-L     | T <b>T</b> C <b>a</b> G <b>T</b> g <b>ACC</b> a <b>T</b> C <b>T</b> a <b>T</b> a           | 21          | G <b>T</b> GGG <b>g</b> T <b>G</b> a <b>G</b> AG <b>g</b> G <b>A</b>                      |
|             | 12                   | 10                     | 5    | 5     | <i>TMEM51</i>       | chr1       | L-24-L     | T <b>g</b> T <b>c</b> T <b>a</b> CC <b>T</b> t <b>C</b> ACC <b>CA</b> C                    | 24          | G <b>g</b> GGG <b>G</b> GG <b>AG</b> GGG <b>g</b> AG <b>G</b>                             |
|             | 13                   | 10                     | 5    | 5     | <i>ORMDL3</i>       | chr17      | R-13-R     | TT <b>C</b> T <b>t</b> t <b>CC</b> AA <b>T</b> a <b>CT</b> G <b>T</b> g                    | 13          | G <b>AC</b> AG <b>G</b> g <b>T</b> GG <b>T</b> G <b>C</b> t <b>G</b> g <b>A</b>           |
|             | 14                   | 10                     | 5    | 5     | <i>HSP90AB2P</i>    | chr4       | R-17-L     | <b>c</b> T <b>T</b> a <b>T</b> C <b>t</b> CC <b>AA</b> a <b>C</b> CT <b>G</b> T <b>a</b>   | 17          | G <b>T</b> GGG <b>G</b> a <b>G</b> a <b>T</b> G <b>t</b> AC <b>AA</b>                     |
|             | 15                   | 9                      | 4    | 5     | <i>CACUL1</i>       | chr10      | R-14-R     | T <b>c</b> C <b>T</b> t <b>T</b> C <b>CA</b> AT <b>g</b> C <b>T</b> G <b>T</b> C           | 14          | G <b>ACA</b> a <b>G</b> AT <b>T</b> G <b>t</b> T <b>c</b> AC <b>CA</b> AA                 |
|             | 16                   | 9                      | 4    | 5     | <i>WDR3</i>         | chr1       | R-24-L     | TT <b>C</b> T <b>G</b> T <b>ag</b> C <b>g</b> A <b>AT</b> C <b>CT</b> t <b>T</b> C         | 24          | G <b>GG</b> G <b>aa</b> GG <b>a</b> G <b>AG</b> AC <b>AG</b> A                            |
|             | 17                   | 9                      | 5    | 4     | <i>ZBTB9</i>        | chr6       | L-23-L     | <b>c</b> C <b>T</b> t <b>T</b> CC <b>Ca</b> T <b>CC</b> a <b>CC</b> CA <b>C</b>            | 23          | G <b>a</b> G <b>a</b> t <b>a</b> T <b>GG</b> AGG <b>G</b> AC <b>AG</b> A                  |
|             | 18                   | 10                     | 5    | 5     | <i>NFX1</i>         | chr9       | R-20-R     | <b>c</b> T <b>t</b> T <b>G</b> T <b>C</b> c <b>t</b> AA <b>C</b> CT <b>G</b> T <b>C</b>    | 20          | <b>c</b> AC <b>AG</b> a <b>T</b> AG <b>GT</b> GA <b>AG</b> AA                             |
|             | 19                   | 9                      | 4    | 5     | <i>KCNK3</i>        | chr2       | L-20-R     | T <b>t</b> T <b>G</b> T <b>CC</b> a <b>CA</b> CC <b>a</b> CC <b>CA</b> C                   | 20          | G <b>AC</b> Ca <b>GA</b> a <b>TGG</b> G <b>AC</b> AG <b>AG</b>                            |
|             | 20                   | 9                      | 5    | 4     | <i>DUSP10</i>       | chr1       | L-11-R     | T <b>C</b> T <b>t</b> CC <b>CT</b> C <b>CT</b> CC <b>Ca</b> G <b>C</b>                     | 11          | G <b>AC</b> A <b>T</b> g <b>AT</b> GG <b>T</b> G <b>C</b> t <b>t</b> AA                   |
|             | 21                   | 10                     | 5    | 5     | <i>HACE1</i>        | chr6       | R-20-R     | TT <b>t</b> T <b>G</b> T <b>a</b> A <b>TA</b> AT <b>CC</b> a <b>G</b> T <b>C</b>           | 20          | G <b>AC</b> t <b>a</b> G <b>AT</b> T <b>G</b> a <b>TGG</b> AG <b>AA</b>                   |
|             | 22                   | 9                      | 4    | 5     | <i>XYLT1</i>        | chr16      | L-12-L     | T <b>C</b> T <b>G</b> CC <b>Ca</b> CC <b>C</b> CC <b>CA</b> C                              | 12          | G <b>g</b> G <b>t</b> T <b>G</b> T <b>G</b> c <b>AG</b> GGG <b>AC</b> a <b>CA</b>         |
|             | 23                   | 9                      | 5    | 4     | <i>LRSAM1</i>       | chr9       | R-11-L     | TT <b>C</b> a <b>G</b> c <b>CA</b> C <b>ct</b> c <b>T</b> G <b>C</b> T <b>G</b> T <b>C</b> | 11          | G <b>ct</b> GGG <b>T</b> a <b>G</b> AG <b>G</b> T <b>G</b> AC <b>AG</b> A                 |

<sup>1</sup> Potential off-target were chosen to contain a mixture of the top-ranked sites from the RVD-5TC and Homology-5TC PROGNOS algorithms.

<sup>2</sup> Differences to *CCR5* or *AAVS1* are highlighted in lower case bold letters.

<sup>3</sup> The *CCR2* off-target site lacks the 5'-T in the right sub-site, which automatically excludes the site when applying the PROGNOS algorithm RVD-5TC.

**Supplementary Table S5. Results of the SMRT sequencing**

| Nuclease ID                 | Nucleotide differences |   |                | Closest Gene        | Match Type    | hg19 Coordinates | Empty Vector |       |                    | indels | total | mutation frequency | indels   | total    | mutation frequency | p-value <sup>2</sup> |
|-----------------------------|------------------------|---|----------------|---------------------|---------------|------------------|--------------|-------|--------------------|--------|-------|--------------------|----------|----------|--------------------|----------------------|
|                             | T <sup>1</sup>         | L | R              |                     |               |                  | indels       | total | mutation frequency |        |       |                    |          |          |                    |                      |
| <b>Experiment #1 - CCR5</b> |                        |   |                |                     |               |                  |              |       |                    |        |       |                    |          |          |                    |                      |
| ZFNC                        | 0                      | 0 | 0              | <i>CCR5</i>         | L-5-R         | chr3:46414544    | 0            | 770   |                    |        |       | 111                | 398      | 27.89%   | 1.00E-33           |                      |
|                             | 2                      | 1 | 1              | <i>CCR2</i>         | L-5-R         | chr3:46399205    | 0            | 7855  |                    |        |       | 365                | 3695     | 9.88%    | 7.00E-89           |                      |
| TC-NC                       | 0                      | 0 | 0              | <i>CCR5</i>         | L-15-R        | chr3:46414528    | 0            | 770   |                    |        |       | 80                 | 700      | 11.43%   | 4.00E-21           |                      |
|                             | 7                      | 2 | 5              | <i>AUTS2</i>        | L-27-R        | chr7:69824484    | 0            | 417   |                    |        | 0     | 728                |          |          |                    |                      |
|                             | 9                      | 4 | 5              | <i>CDH8</i>         | R-11-L        | chr16:62697815   | 0            | 480   |                    |        | 0     | 910                |          |          |                    |                      |
|                             | 10                     | 5 | 5              | <i>CAPZA3</i>       | L-15-L        | chr12:19069027   | 0            | 235   |                    |        | 0     | 355                |          |          |                    |                      |
|                             | 9                      | 4 | 5              | <i>NRXN1</i>        | L-16-L        | chr2:49998175    | 0            | 1264  |                    |        | 1     | 5091               | 0.02%    | 1.60E-01 |                    |                      |
|                             | 10                     | 5 | 5              | <i>HMGCLL1</i>      | L-12-L        | chr6:55393918    | 0            | 733   |                    |        | 0     | 1260               |          |          |                    |                      |
|                             | 10                     | 5 | 5              | <i>PADI3</i>        | R-28-L        | chr1:17587769    | 0            | 1067  |                    |        | 0     | 1635               |          |          |                    |                      |
|                             | 9                      | 5 | 4              | <i>AOAH</i>         | L-25-R        | chr7:36783620    | 0            | 1190  |                    |        | 0     | 1846               |          |          |                    |                      |
|                             | 9                      | 5 | 4              | <i>NRN1</i>         | R-30-L        | chr6:5894870     | 0            | 635   |                    |        | 0     | 960                |          |          |                    |                      |
|                             | 10                     | 5 | 5              | <i>PRPS2</i>        | L-30-L        | chrX:12827379    | 0            | 1122  |                    |        | 0     | 1912               |          |          |                    |                      |
|                             | 10                     | 5 | 5              | <i>LRRC8D</i>       | L-13-R        | chr1:90419966    | 0            | 708   |                    |        | 0     | 1403               |          |          |                    |                      |
|                             | 9                      | 5 | 4              | <i>LIPC</i>         | L-20-L        | chr15:58836266   | 0            | 1017  |                    |        | 0     | 1919               |          |          |                    |                      |
|                             | 10                     | 5 | 5              | <i>PDE9A</i>        | L-19-L        | chr21:44089889   | 0            | 1235  |                    |        | 0     | 1860               |          |          |                    |                      |
|                             | 9                      | 4 | 5              | <i>CCR8</i>         | L-15-R        | chr3:39373972    | 0            | 987   |                    |        | 0     | 1851               |          |          |                    |                      |
|                             | 9                      | 4 | 5              | <i>C11orf82</i>     | R-15-R        | chr11:82667987   | 0            | 1195  |                    |        | 2     | 4334               | 0.05%    | 7.86E-02 |                    |                      |
| 2                           | 0                      | 2 | <i>CCR2</i>    | L-15-R              | chr3:46399189 | 0                | 7855         |       |                    | 5      | 6761  | 0.07%              | 1.30E-02 |          |                    |                      |
| TC06                        | 0                      | 0 | 0              | <i>CCR5</i>         | L-14-R        | chr3:46414526    | 0            | 770   |                    |        | 175   | 813                | 21.53%   | 1.00E-47 |                    |                      |
|                             | 2                      | 0 | 2              | <i>CCR2</i>         | L-14-R        | chr3:46399187    | 0            | 7855  |                    |        | 238   | 7737               | 3.08%    | 3.00E-55 |                    |                      |
|                             | 9                      | 5 | 4              | <i>AOAH</i>         | L-24-R        | chr7:36783618    | 0            | 1190  |                    |        | 0     | 2848               |          |          |                    |                      |
|                             | 8                      | 5 | 3              | <i>SFMBT2</i>       | L-11-L        | chr10:7305526    | 0            | 554   |                    |        | 0     | 2731               |          |          |                    |                      |
|                             | 10                     | 5 | 5              | <i>FAM84A</i>       | L-21-L        | chr2:14774101    | 0            | 1413  |                    |        | 0     | 1680               |          |          |                    |                      |
|                             | 10                     | 5 | 5              | <i>TBL1X</i>        | L-18-L        | chrX:9227692     | 0            | 803   |                    |        | 3     | 2551               | 0.12%    | 4.16E-02 |                    |                      |
|                             | 10                     | 5 | 5              | <i>LOC100422737</i> | L-15-L        | chr6:107261533   | 0            | 821   |                    |        | 0     | 934                |          |          |                    |                      |
|                             | 10                     | 5 | 5              | <i>CAPZA3</i>       | L-19-L        | chr12:19069025   | 0            | 235   |                    |        | 0     | 322                |          |          |                    |                      |
|                             | 9                      | 5 | 4              | <i>LOC728084</i>    | L-17-R        | chr12:89421523   | 0            | 1686  |                    |        | 0     | 1762               |          |          |                    |                      |
|                             | 8                      | 3 | 5              | <i>LOC283038</i>    | L-17-L        | chr10:127381295  | 0            | 1142  |                    |        | 0     | 1282               |          |          |                    |                      |
|                             | 10                     | 5 | 5              | <i>CHADL</i>        | L-15-L        | chr22:41625772   | 0            | 824   |                    |        | 0     | 955                |          |          |                    |                      |
|                             | 8                      | 5 | 3              | <i>TRMT44</i>       | L-22-L        | chr4:8528150     | 0            | 1417  |                    |        | 4     | 3473               | 0.12%    | 2.27E-02 |                    |                      |
|                             | 9                      | 4 | 5              | <i>HS3ST5</i>       | R-18-L        | chr6:114639789   | 1            | 2077  | 0.00048            |        | 0     | 2411               |          |          |                    |                      |
|                             | 10                     | 5 | 5              | <i>NLGN1</i>        | L-22-L        | chr3:173623195   | 0            | 1601  |                    |        | 0     | 1922               |          |          |                    |                      |
|                             | 8                      | 4 | 4              | <i>LOC100133091</i> | R-25-L        | chr7:76237984    | 0            | 1691  |                    |        | 0     | 1705               |          |          |                    |                      |
| 10                          | 5                      | 5 | <i>RALYL</i>   | L-19-L              | chr8:84679140 | 0                | 699          |       |                    | 0      | 664   |                    |          |          |                    |                      |
| <b>Experiment #2 - CCR5</b> |                        |   |                |                     |               |                  |              |       |                    |        |       |                    |          |          |                    |                      |
| ZFNC                        | 0                      | 0 | 0              | <i>CCR5</i>         | L-5-R         | chr3:46414544    | 0            | 770   |                    |        |       | 93                 | 646      | 14.40%   | 7.00E-25           |                      |
|                             | 2                      | 1 | 1              | <i>CCR2</i>         | L-5-R         | chr3:46399205    | 0            | 7855  |                    |        |       | 70                 | 881      | 7.95%    | 2.00E-18           |                      |
|                             | 3                      | 2 | 1              | <i>BTBD10</i>       | L-5-R         | chr11:13485162   | 0            | 313   |                    |        |       | 66                 | 1043     | 6.33%    | 6.00E-17           |                      |
|                             | 4                      | 1 | 3              | <i>TACR3</i>        | L-5-R         | chr4:104555726   | 0            | 720   |                    |        |       | 231                | 1827     | 12.64%   | 6.00E-58           |                      |
|                             | 4                      | 2 | 2              | <i>KRR1</i>         | R-5-L         | chr12:75963450   |              |       | PCR Failure        |        |       |                    |          |          | PCR Failure        |                      |
|                             | 4                      | 3 | 1              | <i>KCNB2</i>        | L-5-R         | chr8:73736816    | 0            | 802   |                    |        |       | 18                 | 1638     | 1.10%    | 1.00E-05           |                      |
|                             | 7                      | 2 | 5              | <i>KDM2A</i>        | R-5-L         | chr11:66963780   | 0            | 970   |                    |        |       | 231                | 2694     | 8.58%    | 2.00E-55           |                      |
| 4                           | 2                      | 2 | <i>WBSCR17</i> | R-6-L               | chr7:70919318 | 0                | 739          |       |                    |        | 41    | 1518               | 2.70%    | 5.00E-11 |                    |                      |
| TC-NC                       | 0                      | 0 | 0              | <i>CCR5</i>         | L-15-R        | chr3:46414528    | 0            | 770   |                    |        |       | 23                 | 293      | 7.85%    | 3.00E-07           |                      |
|                             | 7                      | 2 | 5              | <i>AUTS2</i>        | L-27-R        | chr7:69824484    | 0            | 417   |                    |        | 0     | 348                |          |          |                    |                      |
|                             | 9                      | 4 | 5              | <i>CDH8</i>         | R-11-L        | chr16:62697815   | 0            | 480   |                    |        | 0     | 437                |          |          |                    |                      |
|                             | 10                     | 5 | 5              | <i>CAPZA3</i>       | L-15-L        | chr12:19069027   | 0            | 235   |                    |        | 0     | 297                |          |          |                    |                      |
|                             | 9                      | 4 | 5              | <i>NRXN1</i>        | L-16-L        | chr2:49998175    | 0            | 1264  |                    |        | 0     | 1141               |          |          |                    |                      |
|                             | 10                     | 5 | 5              | <i>HMGCLL1</i>      | L-12-L        | chr6:55393918    | 0            | 733   |                    |        | 0     | 645                |          |          |                    |                      |
|                             | 10                     | 5 | 5              | <i>PADI3</i>        | R-28-L        | chr1:17587769    | 0            | 1067  |                    |        | 0     | 1231               |          |          |                    |                      |
|                             | 9                      | 5 | 4              | <i>AOAH</i>         | L-25-R        | chr7:36783620    | 0            | 1190  |                    |        | 0     | 1054               |          |          |                    |                      |
|                             | 9                      | 5 | 4              | <i>NRN1</i>         | R-30-L        | chr6:5894870     | 0            | 635   |                    |        | 0     | 921                |          |          |                    |                      |
|                             | 10                     | 5 | 5              | <i>PRPS2</i>        | L-30-L        | chrX:12827379    | 0            | 1122  |                    |        | 0     | 973                |          |          |                    |                      |
|                             | 10                     | 5 | 5              | <i>LRRC8D</i>       | L-13-R        | chr1:90419966    | 0            | 708   |                    |        | 0     | 1214               |          |          |                    |                      |
|                             | 9                      | 5 | 4              | <i>LIPC</i>         | L-20-L        | chr15:58836266   | 0            | 1017  |                    |        | 0     | 1461               |          |          |                    |                      |
|                             | 10                     | 5 | 5              | <i>PDE9A</i>        | L-19-L        | chr21:44089889   | 0            | 1235  |                    |        | 0     | 1565               |          |          |                    |                      |
|                             | 9                      | 4 | 5              | <i>CCR8</i>         | L-15-R        | chr3:39373972    | 0            | 987   |                    |        | 0     | 1191               |          |          |                    |                      |
|                             | 9                      | 4 | 5              | <i>C11orf82</i>     | R-15-R        | chr11:82667987   | 0            | 1195  |                    |        | 5     | 4309               | 0.12%    | 1.27E-02 |                    |                      |
| 2                           | 0                      | 2 | <i>CCR2</i>    | L-15-R              | chr3:46399189 | 0                | 7855         |       |                    | 5      | 6875  | 0.07%              | 1.30E-02 |          |                    |                      |

| Nuclease ID                  | Nucleotide differences |   |                  | Closest Gene        | Match Type      | hg19 Coordinates | Empty Vector |       |                    | p-value <sup>2</sup> |             |              |                    |
|------------------------------|------------------------|---|------------------|---------------------|-----------------|------------------|--------------|-------|--------------------|----------------------|-------------|--------------|--------------------|
|                              | T <sup>1</sup>         | L | R                |                     |                 |                  | indels       | total | mutation frequency |                      | indels      | total        | mutation frequency |
| <b>Experiment #1 - AAVS1</b> |                        |   |                  |                     |                 |                  |              |       |                    |                      |             |              |                    |
| ZFNA                         | 0                      | 0 | 0                | <i>AAVS1</i>        | R-6-L           | chr19:55627120   | 0            | 985   |                    | <b>88</b>            | <b>968</b>  | <b>9.10%</b> | <b>1.30E-22</b>    |
|                              | 6                      | 4 | 2                | <i>CHRAC1</i>       | R-6-L           | chr8:141507034   | 0            | 633   |                    | <b>20</b>            | <b>677</b>  | <b>3.00%</b> | <b>3.10E-06</b>    |
|                              | 6                      | 3 | 3                | <i>ANXA8L2</i>      | L-6-R           | chr10:47635367   | 1            | 1484  | 0.07%              | 0                    | 1615        |              |                    |
|                              | 4                      | 3 | 1                | <i>RGS12</i>        | R-5-L           | chr4:3303432     | PCR Failure  |       |                    |                      | PCR Failure |              |                    |
|                              | 5                      | 5 | 0                | <i>ATRNL1</i>       | L-5-R           | chr10:117758695  | 0            | 1599  |                    | <b>46</b>            | <b>1241</b> | <b>3.70%</b> | <b>2.90E-12</b>    |
|                              | 4                      | 2 | 2                | <i>BEGAIN</i>       | R-6-L           | chr14:101033118  | 0            | 864   |                    | <b>32</b>            | <b>727</b>  | <b>4.40%</b> | <b>4.30E-09</b>    |
|                              | 2                      | 1 | 1                | <i>LINC00548</i>    | L-6-R           | chr13:40779943   | 0            | 611   |                    | <b>27</b>            | <b>650</b>  | <b>4.20%</b> | <b>6.60E-08</b>    |
|                              | 3                      | 1 | 2                | <i>LOC100130539</i> | L-5-R           | chr10:44698021   | 0            | 1438  |                    | 0                    | 1230        |              |                    |
|                              | 4                      | 3 | 1                | <i>LHPP</i>         | L-5-R           | chr10:126241979  | 0            | 40    |                    | 0                    | 42          |              |                    |
|                              | 4                      | 3 | 1                | <i>SAG</i>          | L-6-R           | chr2:234242672   | 0            | 1537  |                    | 0                    | 1193        |              |                    |
|                              | 4                      | 3 | 1                | <i>FOXP1</i>        | L-5-R           | chr3:71561355    | 0            | 349   |                    | 0                    | 378         |              |                    |
|                              | 4                      | 1 | 3                | <i>H19</i>          | L-5-R           | chr11:2047066    | 0            | 601   |                    | <b>5</b>             | <b>390</b>  | <b>1.30%</b> | <b>1.20E-02</b>    |
|                              | 4                      | 2 | 2                | <i>SYNPO</i>        | L-5-R           | chr5:149981873   | 0            | 614   |                    | 0                    | 848         |              |                    |
|                              | 4                      | 2 | 2                | <i>MEGF6</i>        | L-5-R           | chr1:3440064     | 0            | 744   |                    | 0                    | 762         |              |                    |
|                              | 4                      | 2 | 2                | <i>TK2</i>          | L-5-R           | chr16:66569551   | 0            | 705   |                    | 0                    | 763         |              |                    |
|                              | 4                      | 2 | 2                | <i>ZNF521</i>       | L-6-R           | chr18:22999787   | 0            | 780   |                    | 0                    | 929         |              |                    |
|                              | 4                      | 3 | 1                | <i>CCDC33</i>       | R-6-L           | chr15:74546976   | 0            | 89    |                    | 0                    | 279         |              |                    |
|                              | 4                      | 3 | 1                | <i>GAS2L3</i>       | R-6-L           | chr12:101079155  | 0            | 47    |                    | 0                    | 63          |              |                    |
|                              | 4                      | 3 | 1                | <i>MIR4299</i>      | R-6-L           | chr11:11689693   | 0            | 1163  |                    | 0                    | 1749        |              |                    |
|                              | 4                      | 3 | 1                | <i>SLC6A19</i>      | R-5-L           | chr5:1180771     | PCR Failure  |       |                    |                      | PCR Failure |              |                    |
| 4                            | 1                      | 3 | <i>RAB11FIP2</i> | L-5-R               | chr10:119572401 | 0                | 652          |       | 0                  | 834                  |             |              |                    |
| 4                            | 1                      | 3 | <i>NMT2</i>      | R-5-L               | chr10:15227469  | 0                | 1101         |       | 0                  | 1338                 |             |              |                    |
| 4                            | 1                      | 3 | <i>CLU</i>       | L-5-R               | chr8:27446702   | 1                | 378          | 0.26% | 0                  | 398                  |             |              |                    |
| 4                            | 1                      | 3 | <i>FRS3</i>      | L-5-R               | chr6:41727782   | 0                | 901          |       | 0                  | 1016                 |             |              |                    |

| Nuclease ID | Nucleotide differences |   |               | Closest Gene        | Match Type     | hg19 Coordinates | Empty Vector |       |                    | p-value <sup>2</sup> |              |               |                    |
|-------------|------------------------|---|---------------|---------------------|----------------|------------------|--------------|-------|--------------------|----------------------|--------------|---------------|--------------------|
|             | T <sup>1</sup>         | L | R             |                     |                |                  | indels       | total | mutation frequency |                      | indels       | total         | mutation frequency |
| TA04        | 0                      | 0 | 0             | <i>AAVS1</i>        | R-15-L         | chr19:55627109   | 0            | 1084  |                    | <b>153</b>           | <b>1217</b>  | <b>13.00%</b> | <b>7.40E-39</b>    |
|             | 7                      | 4 | 3             | <i>SHANK3</i>       | L-18-R         | chr22:51139499   | 1            | 717   | 0.14%              | 1                    | 461          | 0.22%         | 3.80E-01           |
|             | 8                      | 5 | 3             | <i>MRM1</i>         | L-24-L         | chr17:35084432   | 3            | 523   | 0.57%              | 1                    | 827          | 0.12%         |                    |
|             | 8                      | 5 | 3             | <i>LOC283867</i>    | L-21-L         | chr16:65705836   | 0            | 1215  |                    | 0                    | 1454         |               |                    |
|             | 8                      | 4 | 4             | <i>SERPINE1</i>     | L-24-R         | chr7:100769608   | 0            | 983   |                    | 0                    | 35           |               |                    |
|             | 8                      | 4 | 4             | <i>LOC100144595</i> | L-26-R         | chr2:155321871   | 0            | 780   |                    | 0                    | 745          |               |                    |
|             | 8                      | 4 | 4             | <i>RAB4B-EGLN2</i>  | L-10-L         | chr19:41319122   | 0            | 224   |                    | 0                    | 454          |               |                    |
|             | 9                      | 5 | 4             | <i>CDKL5</i>        | L-13-R         | chrX:18438490    | 0            | 1213  |                    | 0                    | 1426         |               |                    |
|             | 10                     | 5 | 5             | <i>HECW1</i>        | L-27-R         | chr7:43424877    | PCR Failure  |       |                    |                      | PCR Failure  |               |                    |
|             | 10                     | 5 | 5             | <i>CPN1</i>         | L-11-R         | chr10:101836505  | 0            | 741   |                    | <b>29</b>            | <b>22513</b> | <b>0.13%</b>  | <b>3.60E-08</b>    |
|             | 10                     | 5 | 5             | <i>KIAA0556</i>     | R-21-L         | chr16:27592811   | 0            | 212   |                    | 0                    | 347          |               |                    |
|             | 10                     | 5 | 5             | <i>TMEM51</i>       | L-24-L         | chr1:15490282    | 0            | 201   |                    | 0                    | 261          |               |                    |
|             | 10                     | 5 | 5             | <i>ORMDL3</i>       | R-13-R         | chr17:38076475   | 0            | 552   |                    | 0                    | 803          |               |                    |
|             | 10                     | 5 | 5             | <i>HSP90AB2P</i>    | R-17-L         | chr4:12840351    | 0            | 1078  |                    | 0                    | 1809         |               |                    |
|             | 9                      | 4 | 5             | <i>CACUL1</i>       | R-14-R         | chr10:120434301  | 0            | 844   |                    | 0                    | 1793         |               |                    |
|             | 9                      | 4 | 5             | <i>WDR3</i>         | R-24-L         | chr1:118483739   | 0            | 1070  |                    | 0                    | 1473         |               |                    |
|             | 9                      | 5 | 4             | <i>ZBTB9</i>        | L-23-L         | chr6:33425193    | 0            | 1188  |                    | 0                    | 1982         |               |                    |
|             | 10                     | 5 | 5             | <i>NFX1</i>         | R-20-R         | chr9:33366385    | 0            | 1055  |                    | 0                    | 1211         |               |                    |
|             | 9                      | 4 | 5             | <i>KCNK3</i>        | L-20-R         | chr2:26928594    | 0            | 452   |                    | 0                    | 726          |               |                    |
|             | 9                      | 5 | 4             | <i>DUSP10</i>       | L-11-R         | chr1:221693332   | 0            | 978   |                    | 0                    | 1544         |               |                    |
| 10          | 5                      | 5 | <i>HACE1</i>  | R-20-R              | chr6:105034857 | 0                | 65           |       | 0                  | 80                   |              |               |                    |
| 9           | 4                      | 5 | <i>XYLT1</i>  | L-12-L              | chr16:17287360 | 0                | 703          |       | 0                  | 1158                 |              |               |                    |
| 9           | 5                      | 4 | <i>LRSAM1</i> | R-11-L              | chr9:130229886 | 0                | 759          |       | 0                  | 1191                 |              |               |                    |

<sup>1</sup> T, total; L, left target sub-site; R, right target sub-site.

<sup>2</sup> Statistically significant indels events are highlighted in bold.

Supplementary Table S6. Mutations induced by CCR5-specific designer nucleases

| Nuclease ID                                                                          | Sequence Reads <sup>1</sup>                                                                          | Mutation type | Frequency (n° reads) |
|--------------------------------------------------------------------------------------|------------------------------------------------------------------------------------------------------|---------------|----------------------|
| ZFNC                                                                                 | TTTCATCTTTGGTTTTGTGGGCAACATGCTGGTCACTCCTCATCTGATAAACTGCAAAAAGGCTGAAGAGCATGACTGACATCTACCTGC           | WT            |                      |
|                                                                                      | TTTCATCTTTGGTTTTGTGGGCAACATGCTGGTCACTCCTCAT <b>Ct</b> gatCTGATAAACTGCAAAAAGGCTGAAGAGCATGACTGACATCTA  | +5            | x56                  |
|                                                                                      | TTTCATCTTTGGTTTTGTGGGCAACATGCTGGTCACTCCTCAT <b>Ct</b> gatCTGATAAACTGCAAAAAGGCTGAAGAGCATGACTGACATCTAC | +4            | x6                   |
|                                                                                      | TTTCATCTTTGGTTTTGTGGGCAACATGCTGGTCACTCCTCAT <b>Ct</b> gatCTGATAAACTGCAAAAAGGCTGAAGAGCATGACTGACATCTAC | +4            | x5                   |
|                                                                                      | TTTCATCTTTGGTTTTGTGGGCAACATGCTGGTCACTCCTCAT <b>Ct</b> gatGATAAACTGCAAAAAGGCTGAAGAGCATGACTGACATCTACC  | +3            | x9                   |
|                                                                                      | TTTCATCTTTGGTTTTGTGGGCAACATGCTGGTCACTCCTCAT <b>Ct</b> gatCTGATAAACTGCAAAAAGGCTGAAGAGCATGACTGACATCTAC | +4            | x3                   |
|                                                                                      | TTTCATCTTTGGTTTTGTGGGCAACATGCTGGTCACTCCTCAT <b>Ct</b> gatCTGATAAACTGCAAAAAGGCTGAAGAGCATGACTGACATCTAC | Δ204          | x2                   |
|                                                                                      | TTTCATCTTTGGTTTTGTGGGCAACATGCTGGTCACTCCTCATCTGAT <b>ct</b> gataACTGCAAAAAGGCTGAAGAGCATGACTGACATCTAC  | +4 (Δ1+5)     | x6                   |
|                                                                                      | TTTCATCTTTGGTTTTGTGGGCAACATGCTGGTCACTCCTCATCTGAT <b>g</b> atAACTGCAAAAAGGCTGAAGAGCATGACTGACATCTACCT  | +2 (Δ1+3)     | x6                   |
|                                                                                      | TTTCATCTTTGGTTTTGTGGGCAACATGCTGGTCACTCCT-----ATAAACTGCAAAAAGGCTGAAGAGCATGACTGACATCTACCTGC            | Δ6            | x2                   |
| TC-NC                                                                                | GTGTTTCATCTTTGGTTTTGTGGGCAACATGCTGGTCACTCCTCATCTGATAAACTGCAAAAAGGCTGAAGAGCATGACTGACATCTACC           | WT            |                      |
|                                                                                      | GTGTTTCATCTTTGGTTTTGTGGGCAACATGCTGG-----TCATCCTGATAAACTGCAAAAAGGCTGAAGAGCATGACTGACATCTACC            | Δ6            | x13                  |
|                                                                                      | GTGTTTCATCTTTGGTTTTGTGGGCAACATGCTGGTCACTCCT <b>ca</b> TCTGATAAACTGCAAAAAGGCTGAAGAGCATGACTGACATCT     | +3            | x4                   |
|                                                                                      | GTGTTTCATCTTTGGTTTTGTGGGCAACATGCTGGTCACTC-----TCCTGATAAACTGCAAAAAGGCTGAAGAGCATGACTGACATCTACC         | Δ3            | x2                   |
|                                                                                      | GTGTTTCATCTTTGGTTTTGTGGGCAACAT-----/ /-----GCT                                                       | Δ238          | x2                   |
| TC06                                                                                 | GTGTTTCATCTTTGGTTTTGTGGGCAACATGCTGGTCACTCCTCATCTGATAAACTGCAAAAAGGCTGAAGAGCATGACTGACATCTACC           | WT            |                      |
|                                                                                      | GTGTTTCATCTTTGGTTTTGTGGGCAACATGCTGG-----TCATCCTGATAAACTGCAAAAAGGCTGAAGAGCATGACTGACATCTACC            | Δ6            | x16                  |
|                                                                                      | GTGTTTCATCTTTGGTTTTGTGGGCAACATGCTGGTCACTCCT <b>ca</b> TCTGATAAACTGCAAAAAGGCTGAAGAGCATGACTGACATCT     | +4            | x5                   |
|                                                                                      | GTGTTTCATCTTTGGTTTTGTGGGCAACATGCTGGTCACTCCTC-----ATAAACTGCAAAAAGGCTGAAGAGCATGACTGACATCTACC           | Δ6            | x4                   |
|                                                                                      | GTGTTTCATCTTTGGTTTTGTGGGCAACATGCTGGTCACTC <b>ca</b> TCTGATAAACTGCAAAAAGGCTGAAGAGCATGACTGACATCT       | +3            | x4                   |
|                                                                                      | GTGTTTCATCTTTGGTTTTGTGGGCAACATGCTGGTCA-----TCATCCTGATAAACTGCAAAAAGGCTGAAGAGCATGACTGACATCTACC         | Δ3            | x4                   |
|                                                                                      | GTGTTTCATCTTTGGTTTTGTGGGCAACATGCTGG-----TCCTGATAAACTGCAAAAAGGCTGAAGAGCATGACTGACATCTACC               | Δ9            | x4                   |
|                                                                                      | GTGTTTCATCTTTGGTTTTGTGGGCAACATGCTGGTCACTC-----AACTGCAAAAAGGCTGAAGAGCATGACTGACATCTACC                 | Δ8            | x3                   |
|                                                                                      | GTGTTTCATCTTTGGTTTTGTGGGCAACATGCTGGTCA-----CTGATAAACTGCAAAAAGGCTGAAGAGCATGACTGACATCTACC              | Δ7            | x3                   |
|                                                                                      | GTGTTTCATCTTTGGTTTTGTGGGCAACAT-----/ /-----GCT                                                       | Δ238          | x3                   |
| ZFNA                                                                                 | GGTTCGTTGACTTTTATCTGTCCCCTCCACCCACAGTGGGGCCACTAGGGACAGGATTGGTGACAGAAAAGCCCCATCCTTAGGCC               | WT            |                      |
|                                                                                      | GGTTCGTTGACTTTTATCTGTCCCCTCCACCCACAGTGGGGCCACTAGGGACAGGATTGGTGACAGAAAAGCCCCATCCTTAGGCC               | +4            | x17                  |
|                                                                                      | GGTTCGTTGACTTTTATCTGTCCCCTCCACCCACAGTGGGG <b>ca</b> CTAGGGACAGGATTGGTGACAGAAAAGCCCCATCCTTAGGCC       | +3            | x6                   |
|                                                                                      | GGTTCGTTGACTTTTATCTGTCCCCTCCACCCACAGTGGGG-----CCACTAGGGACAGGATTGGTGACAGAAAAGCCCCATCCTTAGGCC          | Δ4            | x4                   |
|                                                                                      | GGTTCGTTGACTTTTATCTGTCCCCTCCACCCACAGTGGGG-----ACAGGATTGGTGACAGAAAAGCCCCATCCTTAGGCC                   | Δ10           | x3                   |
|                                                                                      | GGTTCGTTGACTTTTATCTGTCCCCTCCACCCACAG-----GCCACTAGGGACAGGATTGGTGACAGAAAAGCCCCATCCTTAGGCC              | Δ4            | x2                   |
|                                                                                      | GGTTCGTTGACTTTTATCTGTCCCCTCCACCCACAGTGG-----CCACTAGGGACAGGATTGGTGACAGAAAAGCCCCATCCTTAGGCC            | Δ3            | x2                   |
|                                                                                      | GGTTCGTTGACTTTTATCTGTCCCCTCCACCCACa <b>AG</b> ggccACTAGGGACAGGATTGGTGACAGAAAAGCCCCATCCTTAGGCC        | +4 (Δ1+5)     | x2                   |
|                                                                                      | GGTTCGTTGACTTTTATCTGTCCCCTCCACCCACAGTGGGGCC <b>ca</b> CTAGGGACAGGATTGGTGACAGAAAAGCCCCATCCTTAGGCC     | +3            | x2                   |
|                                                                                      | GGTTCGTTGACTTTTATCTGTCCCCTCCACCCACAGTGG-----ACTAGG-ACAGGATTGGTGACAGAAAAGCCCCATCCTTAGGCC              | Δ5            | x2                   |
| TA04                                                                                 | GGTTCGTTGACTTTTATCTGTCCCCTCCACCCACAGTGGGGCCACTAGGGACAGGATTGGTGACAGAAAAGCCCCATCCTTAGGCC               | WT            |                      |
|                                                                                      | GGTTCGTTGACTTTTATCTGTCCCCTCCACCCACAGTGGGG-----ACAGGATTGGTGACAGAAAAGCCCCATCCTTAGGCC                   | Δ10           | x6                   |
|                                                                                      | GGTTCGTTGACTTTTATCTGTCCCCTCCACCCACAGTGG-----CACTAGGGACAGGATTGGTGACAGAAAAGCCCCATCCTTAGGCC             | Δ3            | x4                   |
|                                                                                      | GGTTCGTTGACTTTTATCTGTCCCCTCCACCCACAGTGG-----CACTAGGGACAGGATTGGTGACAGAAAAGCCCCATCCTTAGGCC             | Δ4            | x4                   |
|                                                                                      | GGTTCGTTGACTTTTATCTGTCCCCTCCACCCACAGTGGGG-----ACAGGATTGGTGACAGAAAAGCCCCATCCTTAGGCC                   | Δ9            | x4                   |
|                                                                                      | GGTTCGTTGACTTTTATCTGTCCCCTCCACCCACAGT-----CCACTAGGGACAGGATTGGTGACAGAAAAGCCCCATCCTTAGGCC              | Δ4            | x3                   |
|                                                                                      | GGTTCGTTGACTTTTATCTGTCCCCTCCACC--ACAGT-----CCACTAGGGACAGGATTGGTGACAGAAAAGCCCCATCCTTAGGCC             | Δ6            | x3                   |
|                                                                                      | GGTTCGTTGACTTTTATCTGTCCCCTCCACCCACAGT-----CACTAGGGACAGGATTGGTGACAGAAAAGCCCCATCCTTAGGCC               | Δ5            | x3                   |
|                                                                                      | GGTTCGTTGACTTTTATCTGTCCCCTCCACCCACAGTGG-----CACTAGG-ACAGGATTGGTGACAGAAAAGCCCCATCCTTAGGCC             | Δ4            | x3                   |
|                                                                                      | GGTTCGTTGACTTTTATCTGTCCCCTCCACCC-ACAGT-----CACTAGGGACAGGATTGGTGACAGAAAAGCCCCATCCTTAGGCC              | Δ6            | x2                   |
|                                                                                      | GGTTCGTTGACTTTTATCTGTCCCCTCCACCCACAGTGGGG <b>gg</b> ccACTAGGGACAGGATTGGTGACAGAAAAGCCCCATCCTTAGGCC    | +3            | x2                   |
|                                                                                      | GGTTCGTTGACTTTTATCTGTCCCCTCCACCCACAGTGG-----ACTAGGGACAGGATTGGTGACAGAAAAGCCCCATCCTTAGGCC              | Δ5            | x2                   |
|                                                                                      | GGTTCGTTGACTTTTATCTGTCCCCTCCACCCAC-----TAGGGACAGGATTGGTGACAGAAAAGCCCCATCCTTAGGCC                     | Δ11           | x2                   |
|                                                                                      | GGTTCGTTGACTTTTATCTGTCCCCTCCAC-----TAGGGACAGGATTGGTGACAGAAAAGCCCCATCCTTAGGCC                         | Δ16           | x2                   |
|                                                                                      | GGTTCGTTGACTTTTATCTGTCCCCTCCACC--ACAGT-----CACTAGG-ACAGGATTGGTGACAGAAAAGCCCCATCCTTAGGCC              | Δ8            | x2                   |
|                                                                                      | GGTTCGTTGACTTTTATCTGTCCCCTCCACCCACAGTGG--ACTAGG-ACAGGATTGGTGACAGAAAAGCCCCATCCTTAGGCC                 | Δ4            | x2                   |
|                                                                                      | GGTTCGTTGACTTTTATCTGTCCCCTCCACCCACAGTGG--ACTAG--ACAGGATTGGTGACAGAAAAGCCCCATCCTTAGGCC                 | Δ5            | x2                   |
|                                                                                      | GGTTCGTTGACTTTTATCTGTCCCCTCCACCCACAGTGGGG-CTA--ACAGGATTGGTGACAGAAAAGCCCCATCCTTAGGCC                  | Δ4            | x2                   |
|                                                                                      | GGTTCGTTGACTTTTATCTGTCCCCTCCACCCACAGTGG-----ACAGGATTGGTGACAGAAAAGCCCCATCCTTAGGCC                     | Δ11           | x2                   |
| GGTTCGTTGACTTTTATCTGTCCCCTCCACCCACAGTGGGGCCAC-----AGGATTGGTGACAGAAAAGCCCCATCCTTAGGCC | Δ7                                                                                                   | x2            |                      |

<sup>1</sup> The nuclease target sites are underlined. Insertions are indicated as lower bold letters, deletions with --.

**Supplementary Table S7. List of primers used in this study**

| Primer ID      | Sequence (5'...3')         | Target   | Application  |
|----------------|----------------------------|----------|--------------|
| #985           | aagatggattatcaagtgtcaagtcc | CCR5     | T7E1-Del/Inv |
| #986           | caaagtcccactgggagc         | CCR5     | T7E1-Del/Inv |
| #1093          | tcagtgaagggagcagtg         | IL2RG    | T7E1         |
| #1094          | aacaacacgctaaccacaacc      | IL2RG    | T7E1         |
| #1185          | CCCCTTACCTCTCTAGTCTGTGC    | AAVS1    | T7E1         |
| #1186          | CTCAGGTCTCTGGGAGAGGGTAG    | AAVS1    | T7E1         |
| #1474          | ggcaaagactgggaagttgc       | CCR2     | T7E1-Del/Inv |
| #1475          | GGGACAGAAGCAAACACAGC       | CCR2     | T7E1-Del/Inv |
| #1479          | agccacatcgctcagacac        | GAPDH    | RT-PCR       |
| #1480          | gccaatacgaccaaattcc        | GAPDH    | RT-PCR       |
| #1570          | ccagaagagctgagacatcc       | CCR5     | RT-PCR       |
| #1571          | gctgcgatttgcttcacattg      | CCR5     | RT-PCR       |
| #1574          | gagcacttgggtgcagtaccg      | IL2RG    | RT-PCR       |
| #1575          | cgaacacgaaactgttagcg       | IL2RG    | RT-PCR       |
| #1714          | CCAACGCCGACGGTATCAG        | AAVS1    | RT-PCR       |
| #1716          | GCGATATCTAGGTAGCCACAGG     | AAVS1    | RT-PCR       |
| 003-046414377F | GCACAGGGTGAACAAGATGG       | CCR5     | SMRT         |
| 003-046414377R | ACCACCCCAAAGGTGACCGT       | CCR5     | SMRT         |
| 003-046399065F | TTGAACAAGGACGCATTTCCCCAG   | CCR2     | SMRT         |
| 003-046399065R | CAAAGACCCACTCATTTCAGCAG    | CCR2     | SMRT         |
| 007-069824094F | GGGAAAATTGCAGCTGAAGGACC    | AUTS2    | SMRT         |
| 007-069824094R | CCTGGAAGCAGATCCCTCAAG      | AUTS2    | SMRT         |
| 016-062697711F | ACTGAATGGACCCCTCGTGG       | CDH8     | SMRT         |
| 016-062697711R | GGCTTTGCAGGGCCATTTCAAAC    | CDH8     | SMRT         |
| 002-049998047F | GGGCTTTGAGAGGTAATGAGGG     | NRXN1    | SMRT         |
| 002-049998047R | TACCTGGCTGTGCACAGTGG       | NRXN1    | SMRT         |
| 006-055393767F | GGCTACCCAAATGGATCTGTGAG    | HMGCLL1  | SMRT         |
| 006-055393767R | CCACTCTGTGCAAGTTGGCTTAC    | HMGCLL1  | SMRT         |
| 001-017587659F | AGACACCCATGTCAGGAGGGA      | PADI3    | SMRT         |
| 001-017587659R | CTGGGCCTCAATTTCTCAACTG     | PADI3    | SMRT         |
| 006-005894754F | TTGTATCAGGCTGGCCAGGG       | NRN1     | SMRT         |
| 006-005894754R | CAAGGACAGATGTTCTTCCACTC    | NRN1     | SMRT         |
| 00X-012827277F | CTCATGTACGTCTTAGTGGGAGG    | PRPS2    | SMRT         |
| 00X-012827277R | GGTGGTGATAGAGACTGGAAGTAC   | PRPS2    | SMRT         |
| 001-090419868F | AAAAAACCAGGCATGGGGCTAG     | LRR8D    | SMRT         |
| 001-090419868R | AGTGAGGGCTGATGGCTGAG       | LRR8D    | SMRT         |
| 015-058836113F | GCCGGCCATGAGGACATTTTAC     | LIPC     | SMRT         |
| 015-058836113R | TGGAGAGGGTTCTGGGCCTT       | LIPC     | SMRT         |
| 021-044089791F | GGCCTCAGTTTCAACATCAGTGAC   | PDE9A    | SMRT         |
| 021-044089791R | AAGTGATGCTGGCATGCC         | PDE9A    | SMRT         |
| 003-039373855F | AGTGACCGACTACTACTACCTG     | CCR8     | SMRT         |
| 003-039373855R | AACACCCACTGGTCCAGCAGA      | CCR8     | SMRT         |
| 011-082667886F | GCCACCCACTTTCTGCTAATC      | C11orf82 | SMRT         |
| 011-082667886R | GCACTGAACTTGAGAGCAAGTACC   | C11orf82 | SMRT         |
| 007-036783485F | CAAGGAAGGATAGGCTGGAGATCA   | AOAH     | SMRT         |
| 007-036783485R | CCGAGAGGTTATGGGGTTCC       | AOAH     | SMRT         |
| 012-019068737F | CCTGCCTTTTCAAGTGACTGACTG   | CAPZA3   | SMRT         |
| 012-019068737R | GTGAGTGGTTTTGAGGACTGCTG    | CAPZA3   | SMRT         |
| 010-007305407F | TTAGCCAGGCTGGTCTCGAAC      | SFMBT2   | SMRT         |
| 010-007305407R | TTTGGCCTTCAGGTGGGACACT     | SFMBT2   | SMRT         |
| 002-014773961F | ACGTAAGCTAGCCGGCAGGT       | FAM84A   | SMRT         |

|                |                          |              |      |
|----------------|--------------------------|--------------|------|
| 002-014773961R | ACGCCAAACTTGTCCGGGCTG    | FAM84A       | SMRT |
| 00X-009227571F | CCAAGATCTGTGAGCTTAGCATGC | TBL1X        | SMRT |
| 00X-009227571R | TTGTGGGCAGAGTAGTATCTGACC | TBL1X        | SMRT |
| 006-107261416F | TGCCCTCTCTCACCCTCCT      | LOC100422737 | SMRT |
| 006-107261416R | CTCAGCTTGACTGTTGGTGGTG   | LOC100422737 | SMRT |
| 012-089421427F | GCATTCACTCGCCTGTTCCCTC   | LOC728084    | SMRT |
| 012-089421427R | CTAGGAGAAGGTTCAAAGGCCTG  | LOC728084    | SMRT |
| 010-127381108F | GACACCACCATCCTTGGGGAA    | LOC283038    | SMRT |
| 010-127381108R | GGACTCACAAGGACAGGCTC     | LOC283038    | SMRT |
| 022-041625653F | TGGCGAGAGTAAGAGCCACC     | CHADL        | SMRT |
| 022-041625653R | ACCACCCTGCCAAGCACTAG     | CHADL        | SMRT |
| 004-008528028F | GTCAGTCGATGAGCTGGGATCT   | TRMT44       | SMRT |
| 004-008528028R | TAAGGAGGCTGGAGGGAGCA     | TRMT44       | SMRT |
| 006-114639685F | CCCACTAAGGCTCTTCACAGCA   | HS3ST5       | SMRT |
| 006-114639685R | GGTCCAAGCATAGTGCTGAGTG   | HS3ST5       | SMRT |
| 003-173622983F | GGTCTAGTCCCACAGATTCCAAC  | NLGN1        | SMRT |
| 003-173622983R | GCCACATGAGAGGTCTCTCTTC   | NLGN1        | SMRT |
| 007-076237892F | ACATGTCTGTACCCGAGTCAACAC | LOC100133091 | SMRT |
| 007-076237892R | ATCCCTCAGTAGCTGGCTCC     | LOC100133091 | SMRT |
| 008-084679015F | GACAAGAATGCCCTCATTACCAC  | RALYL        | SMRT |
| 008-084679015R | CCTATCCATGAGCATGACCAAGAG | RALYL        | SMRT |
| 011-066963668F | ATCCATGGTGCACGAGCAGG     | KDM2A        | SMRT |
| 011-066963668R | CATTCAGCCAAGCACTGTGGCTC  | KDM2A        | SMRT |
| 011-013485053F | CCTTTGAATCCCACGTTTTCCCC  | BTBD10       | SMRT |
| 011-013485053R | TTTCAGCTGGCACAGGGGTTTC   | BTBD10       | SMRT |
| 008-073736694F | AGGCATCTCGAGGTGTGCCA     | KCNB2        | SMRT |
| 008-073736694R | GACACTCAGCTTTGTCTCTGCAAC | KCNB2        | SMRT |
| 007-070919207F | TCCCCCAGACTCCACCAACA     | WBSCR17      | SMRT |
| 007-070919207R | GGGAAGGCTGCAACCATTTATGAG | WBSCR17      | SMRT |
| 012-075963284F | CCACAGAGAGAGACACCATCTCA  | KRR1         | SMRT |
| 012-075963284R | AGAGATGGGGGTTTCACCATGTTG | KRR1         | SMRT |
| 004-104555586F | CCCAGTAGGTGGTGCAGCTAT    | TACR3        | SMRT |
| 004-104555586R | GCTATGGATACTGAGAGACTGG   | TACR3        | SMRT |
| 019-055627003F | CCAGGAAATGGGGGTGTGTC     | AAVS1        | SMRT |
| 019-055627003R | GTCCACTTCAGGACAGCATGTTTG | AAVS1        | SMRT |
| 008-141506929F | ATAGCATTGCCACCAGCAGTGTGT | CHRAC1       | SMRT |
| 008-141506929R | CAGCTATTCCGGGAGGCTGAG    | CHRAC1       | SMRT |
| 010-047635249F | CTGAAGACACCATGTCTCATGCC  | ANXA8L2      | SMRT |
| 010-047635249R | CTGGATCAGGAAGAGCAGGAG    | ANXA8L2      | SMRT |
| 004-003303328F | ATGGAGAGTGAGGCCGGGGT     | RGS12        | SMRT |
| 004-003303328R | AAACCTGGCTCATTCCAACGTCC  | RGS12        | SMRT |
| 010-117758576F | GAAGGTGGTGCTTAACCTTCCAG  | ATRNL1       | SMRT |
| 010-117758576R | GGCACTGTATGGCAAAGGACC    | ATRNL1       | SMRT |
| 014-101033005F | ACCTGGACCTTGGCCACGACA    | BEGAIN       | SMRT |
| 014-101033005R | CTTAGTGCCGTGGGTGAGTG     | BEGAIN       | SMRT |
| 013-040779804F | CCTGTGGTGAGATAGCACCTCTAA | LINC00548    | SMRT |
| 013-040779804R | TATCTGGGGTGGCCACAAAAG    | LINC00548    | SMRT |
| 010-044697899F | CCTCCACAACCATGAGTGACATC  | LOC100130539 | SMRT |
| 010-044697899R | CAACCCCTCTCCAGACCTCA     | LOC100130539 | SMRT |
| 010-126241867F | AACCCAAGTGGGGTTCTCATGTG  | LHPP         | SMRT |
| 010-126241867R | AGAATGGCGTGAACCCGGGA     | LHPP         | SMRT |
| 002-234242554F | CAGCTGCTTTTACCTATCCAGGG  | SAG          | SMRT |
| 002-234242554R | ATCAACCCCATACCAAGCAGGTG  | SAG          | SMRT |
| 003-071561247F | TACGTGAGAAAACCACGGCTCAG  | FOXP1        | SMRT |
| 003-071561247R | ACCTTGCTTACAGGGTGTGTCTGC | FOXP1        | SMRT |



|                |                                   |              |      |
|----------------|-----------------------------------|--------------|------|
| 011-002046928F | AACCTCAGGCACCCCTCAAC              | H19          | SMRT |
| 011-002046928R | GTCTCCCTTTTAGCATCTACCAG           | H19          | SMRT |
| 005-149981775F | TTACTGGGCGCCAGGCTCT               | SYNPO        | SMRT |
| 005-149981775R | GCTGGCTTGATATGCTATTTAGACACCTTTC   | SYNPO        | SMRT |
| 001-003439947F | AGCCCTGTGCCGGTTCCTA               | MEGF6        | SMRT |
| 001-003439947R | GCTGCGTGAGGACACCCTT               | MEGF6        | SMRT |
| 016-066569433F | GGATTCTTTATTGAAAGACTGAGAGGTTTTGCC | TK2          | SMRT |
| 016-066569433R | TGCCTAGCACTTAGTAGGGGCTT           | TK2          | SMRT |
| 018-022999683F | TGCTTCTGTGTGCAGGAAGAGG            | ZNF521       | SMRT |
| 018-022999683R | CTTTGTGGGTACAGCGGACAAT            | ZNF521       | SMRT |
| 015-074546864F | GGAGTGACCTCCCAATGGCT              | CCDC33       | SMRT |
| 015-074546864R | CTGGGTGACAAGAGTGAAACTCC           | CCDC33       | SMRT |
| 012-101079037F | GCAAGAGATGGGCTCCCACA              | GAS2L3       | SMRT |
| 012-101079037R | CCCTCATGGAGAACCCTCTGC             | GAS2L3       | SMRT |
| 011-011689575F | CCCTTCTGAGCATTGACACAGGT           | MIR4299      | SMRT |
| 011-011689575R | ACCTACAGGAGTGGGTACAGC             | MIR4299      | SMRT |
| 005-001180652F | CTTGGGGAACCCATTGCCGA              | SLC6A19      | SMRT |
| 005-001180652R | ACCAGGCACCTGGATGCATG              | SLC6A19      | SMRT |
| 010-119572269F | CAGCCTTGCCAAACAACACAC             | RAB11FIP2    | SMRT |
| 010-119572269R | TTGCTTGAGCCAGTAGGTGGA             | RAB11FIP2    | SMRT |
| 010-015227350F | AATCCCTTCAGTAGACCCACACAG          | NMT2         | SMRT |
| 010-015227350R | GGTGGGGCAGGCTGTTTTGT              | NMT2         | SMRT |
| 008-027446593F | TCAGAGCAGAAAACAAGCTACCCTCATG      | CLU          | SMRT |
| 008-027446593R | CAGGGCTCTTCTTTCTCCTGG             | CLU          | SMRT |
| 006-041727666F | ACTCTTCCCAACATCCCAACATCC          | FRS3         | SMRT |
| 006-041727666R | CCAGACTTGGCAGGAAACAGG             | FRS3         | SMRT |
| 019-055627003F | CCAGGAAATGGGGGTGTGTC              | AAVS1        | SMRT |
| 019-055627003R | GTCCACTTCAGGACAGCATGTTTG          | AAVS1        | SMRT |
| 022-051139409F | CAGAGCCTCTGCTCTGGGAT              | SHANK3       | SMRT |
| 022-051139409R | GGAGACTGCTCTCTGCTGGGT             | SHANK3       | SMRT |
| 017-035084318F | TTTACGAGCCGGGAGCCTCT              | MRM1         | SMRT |
| 017-035084318R | GCAGGGGAGAGGGGAAAAAAG             | MRM1         | SMRT |
| 016-065705732F | TCACTTCTGCTCCTCTGCCTG             | LOC283867    | SMRT |
| 016-065705732R | CAGGCTTCTTACATGGCAGCTC            | LOC283867    | SMRT |
| 007-100769506F | CAAGCTGCCCAAGTCCTAG               | SERPINE1     | SMRT |
| 007-100769506R | GGACTCTTGGTCTTTCCCTCATC           | SERPINE1     | SMRT |
| 002-155321765F | TACTCTCCTCTACCCCCCAC              | LOC100144595 | SMRT |
| 002-155321765R | GGTTCTAGTAAGGGATTTAGGGTGCATG      | LOC100144595 | SMRT |
| 019-041319015F | CCCAAATGTTCTGTGCCATGC             | RAB4B-EGLN2  | SMRT |
| 019-041319015R | TTTGCCAAGCAGGGACAGG               | RAB4B-EGLN2  | SMRT |
| 00X-018438371F | CTCAGGTCATGACCATCAGTGATC          | CDKL5        | SMRT |
| 00X-018438371R | GCTTGTGGCTCATGGCACCT              | CDKL5        | SMRT |
| 007-043424775F | ATCACTTGGCAGTCTCCCCTC             | HECW1        | SMRT |
| 007-043424775R | GGTGAGTCCAGTGTATACTCAAGG          | HECW1        | SMRT |
| 010-101836421F | CTGAACAAGAACACAGCAGGTGAG          | CPN1         | SMRT |
| 010-101836421R | TGGCCCAAGAGAAGACTGAGG             | CPN1         | SMRT |
| 016-027592693F | CATCTTTTAAACAGTGATGAAAGGGATAGAGC  | KIAA0556     | SMRT |
| 016-027592693R | TTTTACCAAATACCACCGTTCCCCC         | KIAA0556     | SMRT |
| 001-015490179F | GTCCAGAGATGGTCCTAGCC              | TMEM51       | SMRT |
| 001-015490179R | GGAGGCTGAGGCAGGAGAAT              | TMEM51       | SMRT |
| 017-038076372F | TCGTTGTTGATGTTCTCCAGCACC          | ORMDL3       | SMRT |
| 017-038076372R | ACAAAGTCCCAGGTAGAAGGGAG           | ORMDL3       | SMRT |
| 004-012840270F | CATTTAACAAGAGAGACAACCTGAGGCACAGA  | HSP90AB2P    | SMRT |
| 004-012840270R | AGGTGGGCTGAGAGCTCACA              | HSP90AB2P    | SMRT |
| 010-120434186F | GAGTCACTGCCTCACTGGATTG            | CACUL1       | SMRT |

|                |                                      |        |      |
|----------------|--------------------------------------|--------|------|
| 010-120434186R | TTCTTGGGTATGTCCAGATTCACCCAAAAC       | CACUL1 | SMRT |
| 001-118483616F | GAATTGCAGATTTTTAGGGAATCATCACTTTAGGG  | WDR3   | SMRT |
| 001-118483616R | CTAGTCCTTGTTATTTTTCTCCTAAGTATGGTACTC | WDR3   | SMRT |
| 006-033425103F | GAACAACCTTACCTTGGTCAGAGGG            | ZBTB9  | SMRT |
| 006-033425103R | CCATTCTCACATTCTCTCCACAC              | ZBTB9  | SMRT |
| 009-033366297F | ATTTTTGGGGAATATCACCCACTCCCCAG        | NFX1   | SMRT |
| 009-033366297R | CTAATCTTACCACACAAGAATTGCAGGGATC      | NFX1   | SMRT |
| 002-026928507F | CACAGAGGGTTGTGTTGGCC                 | KCNK3  | SMRT |
| 002-026928507R | AGCACACAAGGGCCGTCTGA                 | KCNK3  | SMRT |
| 001-221693221F | CACCTGTCACAATTCTGGAGCAAC             | DUSP10 | SMRT |
| 001-221693221R | CTAGGTGCTATCTCTCCCCTG                | DUSP10 | SMRT |
| 006-105034730F | TTTGCCTGAAGCCTTTAATTTTTCCACAAGCC     | HACE1  | SMRT |
| 006-105034730R | TAATGACCTGCTGTGTACAAGCTTAAAGGA       | HACE1  | SMRT |
| 016-017287252F | AGTTGGTGGTGGGGCAGAATC                | XYLT1  | SMRT |
| 016-017287252R | AGTGCCCAAGTCAGGCACTTC                | XYLT1  | SMRT |
| 009-130229769F | TGTCCGGCTCTCTCTCTGCT                 | LRSAM1 | SMRT |
| 009-130229769R | GAGGCGTCAAGGCTCAGCAT                 | LRSAM1 | SMRT |
